# Supplementary material for: An efficient preparation of indolizines through a tandem palladium-catalyzed cross-coupling reaction and cycloisomerization
Source: Royal Society of Chemistry journal article supplement (doi:10.1039/c0cc01945c), 2010-01-01

## Supporting Information

# An efficient preparation of indolizines through a tandem palladium-catalyzed cross-coupling reaction and cycloisomerization

Hyunseok Kim,<sup>†</sup> Kwangmoo Lee,<sup>†</sup> Sunggak Kim,<sup>\*,‡</sup> and Phil Ho Lee<sup>\*,†</sup>

<sup>†</sup>*Department of Chemistry, Kangwon National University, Chuncheon 200-701, Republic of Korea.*

<sup>‡</sup>*Division of Chemistry and Biological Chemistry, School of Physical & Mathematical Sciences, Nanyang Technological University, Singapore 637371*

*phlee@kangwon.ac.kr*

### Table of Contents

Experimental procedure and data of compounds: S2-S11

<sup>1</sup>H and <sup>13</sup>C NMR spectra for compounds: S12-S45

## Experimental Section

**General:** Reactions were carried out in oven-dried glassware under nitrogen atmosphere. All commercial reagents were used without purification. Toluene was dried with  $\text{CaH}_2$ . All reaction mixtures were stirred magnetically and were monitored by thin-layer chromatography using silica gel percolated glass plates, which were visualized with UV light and then developed using either iodine or a solution of anisaldehyde. Flash column chromatography was carried out using silica gel (230-400 mesh).  $^1\text{H}$  NMR (300 MHz or 400 MHz) and  $^{13}\text{C}$  NMR (100 MHz) spectra were recorded on NMR spectrometer. Deuterated chloroform was used as the solvent, and chemical shift values ( $\delta$ ) are reported in parts per million relative to the residual signals of this solvent ( $\delta$  7.24 for  $^1\text{H}$  and  $\delta$  77.0 for  $^{13}\text{C}$ ). Infrared spectra were recorded on FT-IR spectrometer as either a thin film pressed between two sodium chloride plates or as a solid suspended in a potassium bromide disk. Mass spectra were obtained from the KBSI on high resolution mass spectrometer.

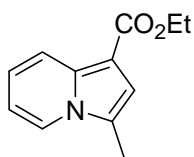

**1-Ethoxycarbonyl-3-methylindolizine (3a)<sup>1</sup>:** To a suspension of  $\text{Pd}(\text{OAc})_2$  (5.4 mg, 0.024 mmol, 8 mol %) and Xantphos (28.0 mg, 0.048 mmol, 16 mol %) in THF (0.4 mL) was added 2-pyridinyl trifluoromethanesulfonate (46.0  $\mu\text{L}$ , 0.3 mmol) at room temperature under nitrogen atmosphere. After being stirred for 30 min, organoindium reagent generated in situ from indium (69.0 mg, 0.6 mmol), sodium iodide (135.0 mg,

0.9 mmol) and ethyl 4-bromo-2-pentynoate (185.0 mg, 0.9 mmol) in THF (0.8 mL) was added and the mixture was stirred at 90 °C for 1h 30min. The reaction mixture was quenched with saturated NaHCO<sub>3</sub>. The aqueous layer was extracted with CH<sub>2</sub>Cl<sub>2</sub> (3 x 20 mL) and the combined organic layers were washed with brine, dried over MgSO<sub>4</sub>, filtered and concentrated under reduced pressure. The residue was purified by silica gel column chromatography (EtOAc/hexane = 1/10) give 1-ethoxycarbonyl-3-methylindolizine (45.0 mg, 75%). Deep blue liquid. <sup>1</sup>H NMR (400 MHz, CDCl<sub>3</sub>) δ 8.19 (d, *J* = 9.0 Hz, 1H), 7.79 (d, *J* = 7.0 Hz, 1H), 7.04 (t, *J* = 7.8 Hz, 1H), 7.04 (s, 1H), 6.77 (t, *J* = 6.8 Hz, 1H), 4.36 (q, *J* = 7.1 Hz, 2H), 2.45 (s, 3H), 1.40 (t, *J* = 7.1 Hz, 3H); <sup>13</sup>C NMR (100 MHz, CDCl<sub>3</sub>) δ 165.6, 136.0, 123.1, 121.4, 121.3, 120.3, 115.1, 112.6, 103.2, 59.8, 15.1, 11.9; IR (film) 2979, 1686, 1525, 1509, 1424, 1384, 1309, 1222, 1122, 1107, 1042 cm<sup>-1</sup>; HRMS (EI) calcd for C<sub>12</sub>H<sub>13</sub>NO<sub>2</sub> 203.0946, found 203.0945.

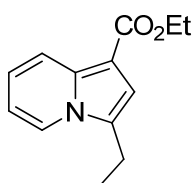

**1-Ethoxycarbonyl-3-ethylindolizine (3b)<sup>2</sup>:** Deep blue liquid. <sup>1</sup>H NMR (400 MHz, CDCl<sub>3</sub>) δ 8.20 (dt, *J* = 9.0, 1.2, 1.0 Hz, 1H), 7.82 (d, *J* = 7.0 Hz, 1H), 7.10-7.01 (m, 2H), 6.75 (td, *J* = 7.0, 1.1 Hz, 1H), 4.37 (q, *J* = 7.1 Hz, 2H), 2.78 (q, *J* = 7.5 Hz, 2H), 1.41 (t, *J* = 7.3 Hz, 6H); <sup>13</sup>C NMR (100 MHz, CDCl<sub>3</sub>) δ 164.2, 134.7, 126.0, 121.6, 120.2, 118.9, 111.8, 111.1, 101.7, 58.4, 17.9, 13.7, 10.3; IR (film) 2973, 1685, 1509, 1425, 1218, 1078, 1051, 775, 738 cm<sup>-1</sup>; HRMS (EI) calcd for C<sub>13</sub>H<sub>15</sub>NO<sub>2</sub> 217.1103, found 217.1103.

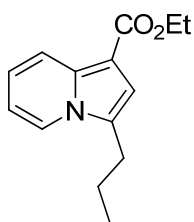

**1-Ethoxycarbonyl-3-propylindolizine (3c):** Deep blue solid. m.p. 32 °C.  $^1\text{H}$  NMR (400 MHz,  $\text{CDCl}_3$ )  $\delta$  8.19 (dt,  $J = 9.0, 1.2$  Hz, 1H), 7.84 (d,  $J = 7.0$  Hz, 1H), 7.05-7.00 (m, 2H), 6.73 (td,  $J = 6.7, 1.3$  Hz, 1H), 4.36 (q,  $J = 7.1$  Hz, 2H), 2.75 (t,  $J = 7.5$  Hz, 2H), 1.80 (q,  $J = 7.5$  Hz, 2H), 1.41 (t,  $J = 7.1$  Hz, 3H);  $^{13}\text{C}$  NMR (100 MHz,  $\text{CDCl}_3$ )  $\delta$  165.6, 136.0, 125.9, 123.1, 121.5, 120.4, 114.1, 112.5, 103.2, 59.8, 28.2, 20.6, 15.1, 14.4; IR (film) 2961, 2872, 1687, 1509, 1425, 1215, 1094, 1055, 776, 737  $\text{cm}^{-1}$ ; HRMS (EI) calcd for  $\text{C}_{14}\text{H}_{17}\text{NO}_2$  231.1259, found 231.1259.

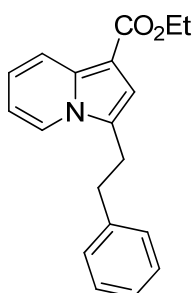

**1-Ethoxycarbonyl-3-phenethylindolizine (3d):** Deep blue liquid.  $^1\text{H}$  NMR (400 MHz,  $\text{CDCl}_3$ )  $\delta$  8.20 (d,  $J = 9.0$  Hz, 1H), 7.77 (d,  $J = 7.1$  Hz, 1H), 7.31 (t,  $J = 7.1$  Hz, 3H), 7.25-7.22 (m, 3H), 7.03 (dd,  $J = 9.0, 6.6$  Hz, 2H), 6.71 (t,  $J = 6.6$  Hz, 1H), 4.37 (q,  $J = 7.1$  Hz, 2H), 3.09 (s, 4H), 1.41 (t,  $J = 7.1$  Hz, 3H);  $^{13}\text{C}$  NMR (100 MHz,  $\text{CDCl}_3$ )  $\delta$  165.6, 141.4, 136.1, 129.0, 128.7, 126.8, 125.3, 123.0, 121.7, 120.4, 114.2, 112.6, 103.4, 59.8, 34.0, 28.3, 15.1; IR (film) 2978, 1685, 1509, 1425, 1218, 1065, 1041, 775, 738, 699  $\text{cm}^{-1}$ ; HRMS (EI) calcd for  $\text{C}_{19}\text{H}_{19}\text{NO}_2$  293.1416, found 293.1416.

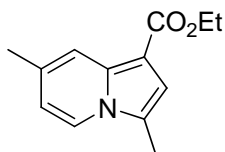

**1-Ethoxycarbonyl-3,7-dimethylindolizine (3e):** Red brown liquid.  $^1\text{H}$  NMR (400 MHz,  $\text{CDCl}_3$ )  $\delta$  7.98 (s, 1H), 7.69 (d,  $J = 7.0$  Hz, 1H), 6.95 (s, 1H), 6.61 (dd,  $J = 7.0$ , 1.7 Hz, 1H), 4.35 (q,  $J = 7.1$  Hz, 2H), 2.42 (s, 3H), 2.39 (s, 3H), 1.40 (t,  $J = 7.1$  Hz, 3H);  $^{13}\text{C}$  NMR (100 MHz,  $\text{CDCl}_3$ )  $\delta$  165.3, 136.2, 132.0, 122.2, 120.2, 118.3, 114.8, 114.3, 101.1, 59.2, 21.3, 14.7, 11.4; IR (film) 2978, 1683, 1513, 1418, 1231, 1182, 1075, 1040, 774  $\text{cm}^{-1}$ ; HRMS (EI) calcd for  $\text{C}_{13}\text{H}_{15}\text{NO}_2$  217.1103, found 217.1103.

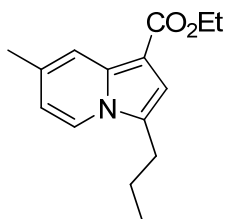

**1-Ethoxycarbonyl-7-methyl-3-propylindolizine (3f):** Brown solid. m.p. 56  $^{\circ}\text{C}$ .  $^1\text{H}$  NMR (400 MHz,  $\text{CDCl}_3$ )  $\delta$  7.98 (s, 1H), 7.74 (d,  $J = 7.1$  Hz, 1H), 6.94 (s, 1H), 6.58 (dd,  $J = 7.1$ , 1.6 Hz, 1H), 4.35 (q,  $J = 7.1$  Hz, 2H), 2.73 (t,  $J = 7.5$  Hz, 2H), 2.38 (s, 3H), 1.83-1.74 (m, 2H), 1.43 (t,  $J = 7.1$  Hz, 3H), 1.04 (t,  $J = 7.5$  Hz, 3H);  $^{13}\text{C}$  NMR (100 MHz,  $\text{CDCl}_3$ )  $\delta$  165.8, 136.7, 132.5, 125.3, 122.7, 118.8, 115.1, 113.7, 101.6, 59.6, 28.2, 21.7, 20.7, 15.1, 14.5; IR (film) 2961, 2872, 1685, 1514, 1229, 1181, 1053, 774  $\text{cm}^{-1}$ ; HRMS (EI) calcd for  $\text{C}_{15}\text{H}_{19}\text{NO}_2$  245.1416, found 245.1416.

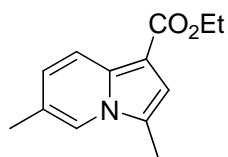

**1-Ethoxycarbonyl-3,6-dimethylindolizine (3g):** Red brown liquid  $^1\text{H}$  NMR (400 MHz,  $\text{CDCl}_3$ )  $\delta$  8.09 (d,  $J = 9.1$  Hz, 1H), 7.57 (s, 1H), 6.67 (s, 1H), 6.90 (dd,  $J = 9.1, 1.2$  Hz, 1H), 4.34 (q,  $J = 7.1$  Hz, 2H), 2.42 (s, 3H), 2.33 (s, 3H), 1.39 (t,  $J = 7.1$  Hz, 3H);  $^{13}\text{C}$  NMR (100 MHz,  $\text{CDCl}_3$ )  $\delta$  165.6, 134.8, 124.7, 122.1, 120.9, 120.9, 119.6, 114.8, 102.7, 59.7, 18.9, 15.1, 11.9; IR (film) 2978, 1686, 1525, 1427, 1293, 1226, 1086, 1056, 784  $\text{cm}^{-1}$ ; HRMS (EI) calcd for  $\text{C}_{13}\text{H}_{15}\text{NO}_2$  217.1103, found 217.1103.

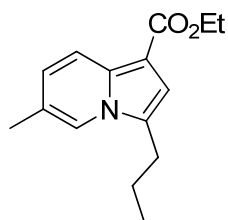

**1-Ethoxycarbonyl-5-methyl-3-propylindolizine (3h):** Blue green solid. m.p. 52  $^\circ\text{C}$ .  $^1\text{H}$  NMR (400 MHz,  $\text{CDCl}_3$ )  $\delta$  8.09 (d,  $J = 9.4$  Hz, 1H), 7.61 (s, 1H), 6.98 (s, 1H), 6.88 (dd,  $J = 9.0, 1.3$  Hz, 1H), 4.35 (q,  $J = 7.1$  Hz, 2H), 2.72 (t,  $J = 7.5$  Hz, 2H), 2.31 (s, 3H), 1.87-1.75(m, 2H), 1.40 (t,  $J = 7.1$  Hz, 3H), 1.05 (t,  $J = 7.5$  Hz, 3H);  $^{13}\text{C}$  NMR (100 MHz,  $\text{CDCl}_3$ )  $\delta$  165.7, 134.9, 125.6, 124.7, 122.0, 120.9, 119.7, 113.8, 102.8, 59.7, 28.2, 20.6, 18.9, 15.1, 14.5; IR (film) 2960, 2872, 1686, 1510, 1438, 1214, 1054, 800  $\text{cm}^{-1}$ ; HRMS (EI) calcd for  $\text{C}_{15}\text{H}_{19}\text{NO}_2$  245.1416, found 245.1416.

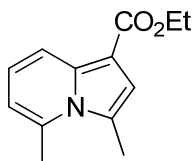

**1-Ethoxycarbonyl-3,5-dimethylindolizine (3i):** Red brown solid. m.p. 58 °C.  $^1\text{H}$  NMR (400 MHz,  $\text{CDCl}_3$ )  $\delta$  8.08 (d,  $J = 9.0$  Hz, 1H), 6.92 (s, 1H), 6.82 (dd,  $J = 9.0, 6.7$  Hz, 1H), 6.34 (d,  $J = 6.7$  Hz, 1H), 4.33 (q,  $J = 7.1$  Hz, 2H), 2.83 (s, 3H), 2.79 (s, 3H), 1.38 (t,  $J = 7.1$  Hz, 3H);  $^{13}\text{C}$  NMR (100 MHz,  $\text{CDCl}_3$ )  $\delta$  165.4, 138.8, 136.3, 123.7, 122.1, 118.5, 117.8, 114.2, 102.7, 59.7, 21.9, 17.4, 15.1; IR (film) 2978, 1687, 1525, 1427, 1293, 1226, 1086, 1056, 784  $\text{cm}^{-1}$ ; HRMS (EI) calcd for  $\text{C}_{13}\text{H}_{15}\text{NO}_2$  217.1103, found 217.1103.

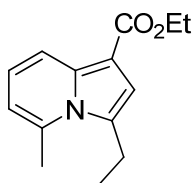

**1-Ethoxycarbonyl-3-ethyl-5-methylindolizine (3j):** Deep blue solid. m.p. 60 °C.  $^1\text{H}$  NMR (400 MHz,  $\text{CDCl}_3$ )  $\delta$  8.14 (d,  $J = 9.0$  Hz, 1H), 7.03 (s, 1H), 6.68 (dd,  $J = 9.0, 6.7$  Hz, 1H), 6.39 (d,  $J = 6.7$  Hz, 1H), 4.35 (q,  $J = 7.1$  Hz, 2H), 3.26 (q,  $J = 7.3$  Hz, 2H), 2.86 (s, 3H), 1.42-1.25 (m, 6H);  $^{13}\text{C}$  NMR (100 MHz,  $\text{CDCl}_3$ )  $\delta$  164.0, 137.5, 134.9, 129.1, 120.6, 117.1, 114.0, 113.1, 101.5, 58.3, 22.2, 20.9, 13.7, 13.4; IR (film) 2775, 1685, 1525, 1428, 1222, 1086, 1044, 783  $\text{cm}^{-1}$ ; HRMS (EI) calcd for  $\text{C}_{14}\text{H}_{17}\text{NO}_2$  231.1259, found 231.1259.

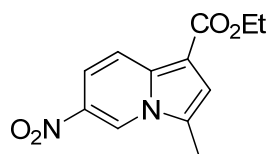

**1-Ethoxycarbonyl-3methyl-6-nitroindolizine (3k):** Orange solid. m.p. 102 °C.  $^1\text{H}$  NMR (400 MHz,  $\text{CDCl}_3$ )  $\delta$  8.96 (d,  $J = 1.7$  Hz, 1H), 8.25 (d,  $J = 10.0$  Hz, 1H), 7.74 (dd,  $J = 10.0, 2.0$  Hz, 1H), 7.21 (d,  $J = 0.7$  Hz, 1H), 4.39 (q,  $J = 7.1$  Hz, 2H), 2.58 (s, 3H), 1.42 (t,  $J = 7.1$  Hz, 3H);  $^{13}\text{C}$  NMR (100 MHz,  $\text{CDCl}_3$ )  $\delta$  164.1, 137.1, 134.9, 124.2, 123.4, 119.6, 118.3, 114.2, 106.6, 60.1, 14.5, 11.5; IR (film) 2980, 1695, 1537, 1434, 1348, 1321, 1236, 1057, 803  $\text{cm}^{-1}$ ; HRMS (EI) calcd for  $\text{C}_{12}\text{H}_{12}\text{N}_2\text{O}_4$  248.0797, found 248.0797.

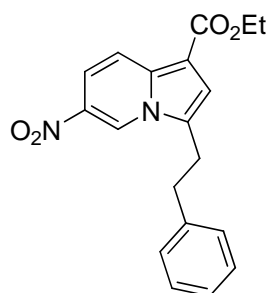

**1-Ethoxycarbonyl-6-nitro-3-phenethylindolizine (3l):** Orange solid. m.p. 105 °C.  $^1\text{H}$  NMR (400 MHz,  $\text{CDCl}_3$ )  $\delta$  8.77 (d,  $J = 1.8$  Hz, 1H), 8.22 (d,  $J = 10.0$  Hz, 1H), 7.69 (dd,  $J = 10.0, 1.8$  Hz, 1H), 7.30-7.17 (m, 6H), 4.39 (q,  $J = 7.1$  Hz, 2H), 3.22-3.10 (m, 4H), 1.42 (t,  $J = 7.1$  Hz, 3H);  $^{13}\text{C}$  NMR (100 MHz,  $\text{CDCl}_3$ )  $\delta$  164.6, 140.5, 137.4, 135.3, 129.2, 128.6, 127.1, 123.7, 120.0, 117.9, 114.7, 107.1, 66.3, 60.6, 34.5, 28.1, 15.0; IR (film) 2980, 1693, 1533, 1499, 1350, 1219, 1050, 819  $\text{cm}^{-1}$ ; HRMS (EI) calcd for  $\text{C}_{19}\text{H}_{18}\text{N}_2\text{O}_4$  338.1267, found 338.1267.



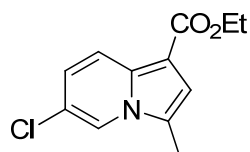

**6-Chloro-1-ethoxycarbonyl-3-methylindolizine (3m):** Apicot solid. m.p. 60 °C.  $^1\text{H}$  NMR (400 MHz,  $\text{CDCl}_3$ )  $\delta$  8.14 (d,  $J = 9.6$  Hz, 1H), 7.82 (s, 1H), 7.04 (s, 1H), 6.98 (dd,  $J = 9.6, 1.7$  Hz, 1H), 4.35 (q,  $J = 7.1$  Hz, 2H), 2.44 (s, 3H), 1.40 (t,  $J = 7.1$  Hz, 3H);  $^{13}\text{C}$  NMR (100 MHz,  $\text{CDCl}_3$ )  $\delta$  163.7, 132.5, 121.0, 120.4, 120.0, 119.5, 119.3, 114.5, 103.1, 58.6, 13.6, 10.4; IR (film) 2928, 1691, 1523, 1503, 1433, 1224, 1055, 797  $\text{cm}^{-1}$ ; HRMS (EI) calcd for  $\text{C}_{12}\text{H}_{12}\text{ClNO}_2$  237.0557, found 237.0557.

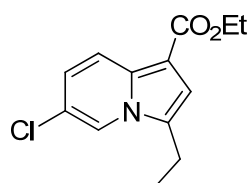

**6-Chloro-1-ethoxycarbonyl-3-ethylindolizine (3n):** Gray solid. m.p. 69 °C.  $^1\text{H}$  NMR (400 MHz,  $\text{CDCl}_3$ )  $\delta$  8.14 (d,  $J = 9.5$  Hz, 1H), 7.84 (s, 1H), 7.05 (s, 1H), 6.97 (dd,  $J = 9.5, 1.7$  Hz, 1H), 4.36 (q,  $J = 7.1$  Hz, 2H), 2.76 (q,  $J = 7.4$  Hz, 2H), 1.41 (t,  $J = 7.3$  Hz, 6H);  $^{13}\text{C}$  NMR (100 MHz,  $\text{CDCl}_3$ )  $\delta$  165.2, 134.0, 127.9, 122.5, 120.9, 120.8, 114.0, 104.6, 60.0, 19.4, 15.0, 11.6; IR (film) 2974, 1690, 1521, 1503, 1221, 1047, 800  $\text{cm}^{-1}$ ; HRMS (EI) calcd for  $\text{C}_{13}\text{H}_{14}\text{ClNO}_2$  251.0713, found 251.0713.

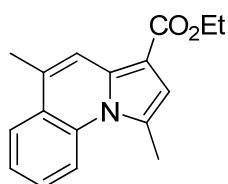

**3-Ethoxycarbonyl-1,5-dimethylpyrrolo[1,2-*a*]quinoline (3o):** Red brown solid. m.p. 63 °C. <sup>1</sup>H NMR (400 MHz, CDCl<sub>3</sub>) δ 8.40 (d, *J* = 8.5 Hz, 1H), 8.09 (s, 1H), 7.84 (dd, *J* = 8.1, 1.5 Hz, 1H), 7.55-7.51 (m, 1H), 7.45-7.41 (m, 1H), 6.89 (s, 1H), 4.37 (q, *J* = 7.1 Hz, 2H), 2.92 (s, 3H), 2.55 (s, 3H), 1.41 (t, *J* = 7.1 Hz, 3H); <sup>13</sup>C NMR (100 MHz, CDCl<sub>3</sub>) δ 165.6, 135.8, 135.7, 129.6, 127.8, 126.5, 126.1, 125.6, 124.3, 118.7, 116.9, 115.9, 104.8, 59.9, 19.8, 19.2, 15.0; IR (film) 2975, 1689, 1447, 1419, 1251, 1205, 1085, 749 cm<sup>-1</sup>; HRMS (EI) calcd for C<sub>17</sub>H<sub>17</sub>NO<sub>2</sub> 267.1259, found 267.1259.

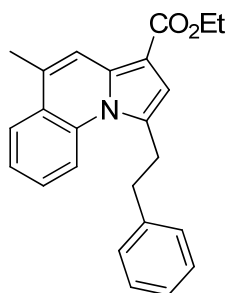

**3-Ethoxycarbonyl-5-methyl-1-phenethylpyrrolo[1,2-*a*]quinoline (3p):** Red brown solid. m.p. 93 °C. <sup>1</sup>H NMR (400 MHz, CDCl<sub>3</sub>) δ 8.35 (d, *J* = 8.6 Hz, 1H), 8.14 (s, 1H), 7.87 (dd, *J* = 8.0, 1.4 Hz, 1H), 7.53 (t, *J* = 7.5 Hz, 1H), 7.45 (t, *J* = 7.5 Hz, 1H), 7.39-7.27 (m, 5H), 7.04 (s, 1H), 4.39 (q, *J* = 7.1 Hz, 2H), 3.57 (t, *J* = 8.5, 8.0 Hz, 2H), 3.18 (t, *J* = 8.5, 8.0 Hz, 2H), 2.58 (s, 3H), 1.43 (t, *J* = 7.1 Hz, 3H); <sup>13</sup>C NMR (100 MHz, CDCl<sub>3</sub>) δ 165.6, 141.6, 136.0, 135.5, 130.9, 130.0, 129.1, 128.9, 128.0, 126.8, 126.3, 125.7, 124.4, 118.8, 117.4, 114.4, 105.0, 60.0, 35.4, 34.5, 19.8, 15.1; IR (film) 2927, 1689, 1556, 1449, 1421, 1251, 1206, 1088, 748, 698 cm<sup>-1</sup>; HRMS (EI) calcd for C<sub>24</sub>H<sub>23</sub>NO<sub>2</sub> 357.1729, found 357.1729.

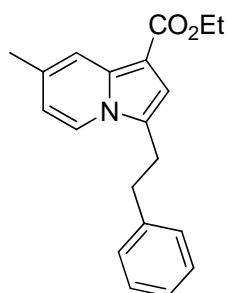

**1-Ethoxycarbonyl-7-methyl-3-phenethylindolizine (3q):** Red brown liquid.  $^1\text{H}$  NMR (400 MHz,  $\text{CDCl}_3$ )  $\delta$  7.99 (s, 1H), 7.68 (d,  $J = 7.1$  Hz, 1H), 7.31 (t,  $J = 7.1$  Hz, 2H), 7.25-7.21 (m, 3H), 7.03 (s, 1H), 6.56 (dd,  $J = 7.1, 1.7$  Hz, 1H), 4.36 (q,  $J = 7.1$  Hz, 2H), 3.09-3.05 (m, 4H), 2.38 (s, 3H), 1.41 (t,  $J = 7.1$  Hz, 3H);  $^{13}\text{C}$  NMR (100 MHz,  $\text{CDCl}_3$ )  $\delta$  164.3, 140.1, 135.3, 131.2, 127.6, 127.3, 125.3, 123.2, 121.1, 117.4, 113.8, 112.4, 101.3, 58.3, 32.6, 26.9, 20.2, 13.7; IR (film) 2930, 1684, 1513, 1227, 1183, 1063, 1041, 774,  $700\text{ cm}^{-1}$ ; HRMS (EI) calcd for  $\text{C}_{20}\text{H}_{21}\text{NO}_2$  307.1572, found 307.1572.

## References

1. (a) T. Tamura, Y. Sumida, Y. Ikeda, *Chem. Pharm. Bull.*, 1972, **20**, 1058; (b) D. R. Bragg, D. G. Wibberley, *J. Chem. Soc.* 1963, 3277.
2. A. R. Katritzky, G. Oiu, B. Yang, H. Y. He, *J. Org. Chem.*, 1999, **64**, 7618.

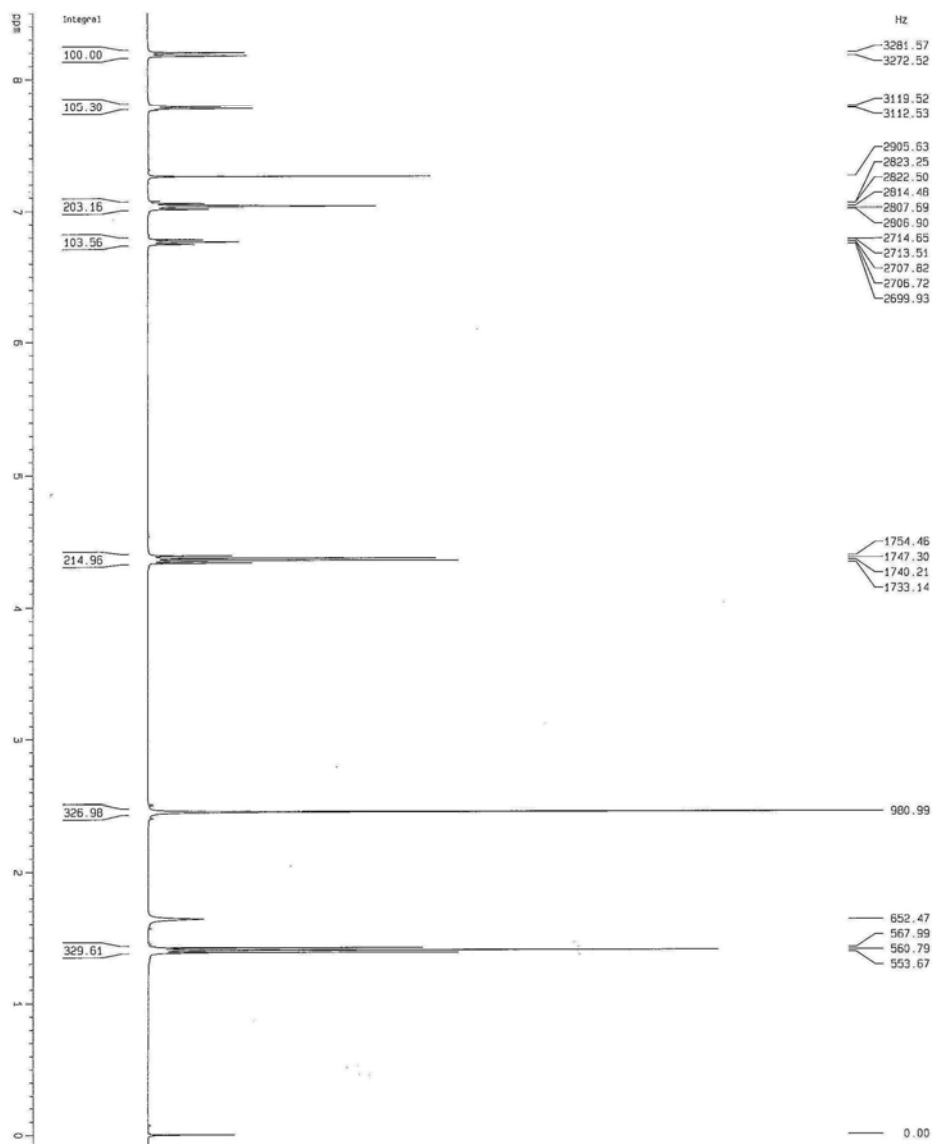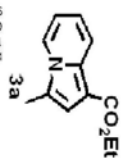

Current Data Parameters  
 NAME: my-08  
 EXPNO: 71  
 PROCNO: 1

F2 - Acquisition Parameters  
 Date\_: 20080523  
 Time: 11.20  
 INSTRUM: spect  
 PROBRD: 5 mm Dui1 13C/  
 PULPROG: zg30  
 TO: 32789  
 SOLVENT: CDCl3  
 NS: 32  
 DS: 4  
 SWH: 8231.695 Hz  
 FIDRES: 0.250967 Hz  
 AQ: 1.982444 sec  
 RG: 296  
 DM: 60.800 usec  
 DE: 6.00 usec  
 TE: 297.2 K  
 D1: 1.00000000 sec  
 ACQRES: 0.00000000 sec  
 MDCKK: 0.01500000 sec

===== CHANNEL f1 =====  
 NUC1: 13C  
 P1: 11.00 usec  
 PL: -2.00 dB  
 SFO1: 400.1254710 MHz

F2 - Processing parameters  
 SI: 16384  
 SF: 400.1300690 MHz  
 WTM: EM  
 SSB: 0  
 LB: 0.30 Hz  
 GB: 0  
 PC: 1.00

1D NMR plot parameters  
 CX: 30.00 cm  
 CY: 20.00 cm  
 CZ: 81.500 ppm  
 E1: 31.10 Hz  
 E2: -0.10 ppm  
 F2: -40.01 Hz  
 PRGCM: 0.26657 ppm/cm  
 HZCM: 114.70353 Hz/cm

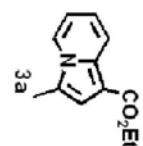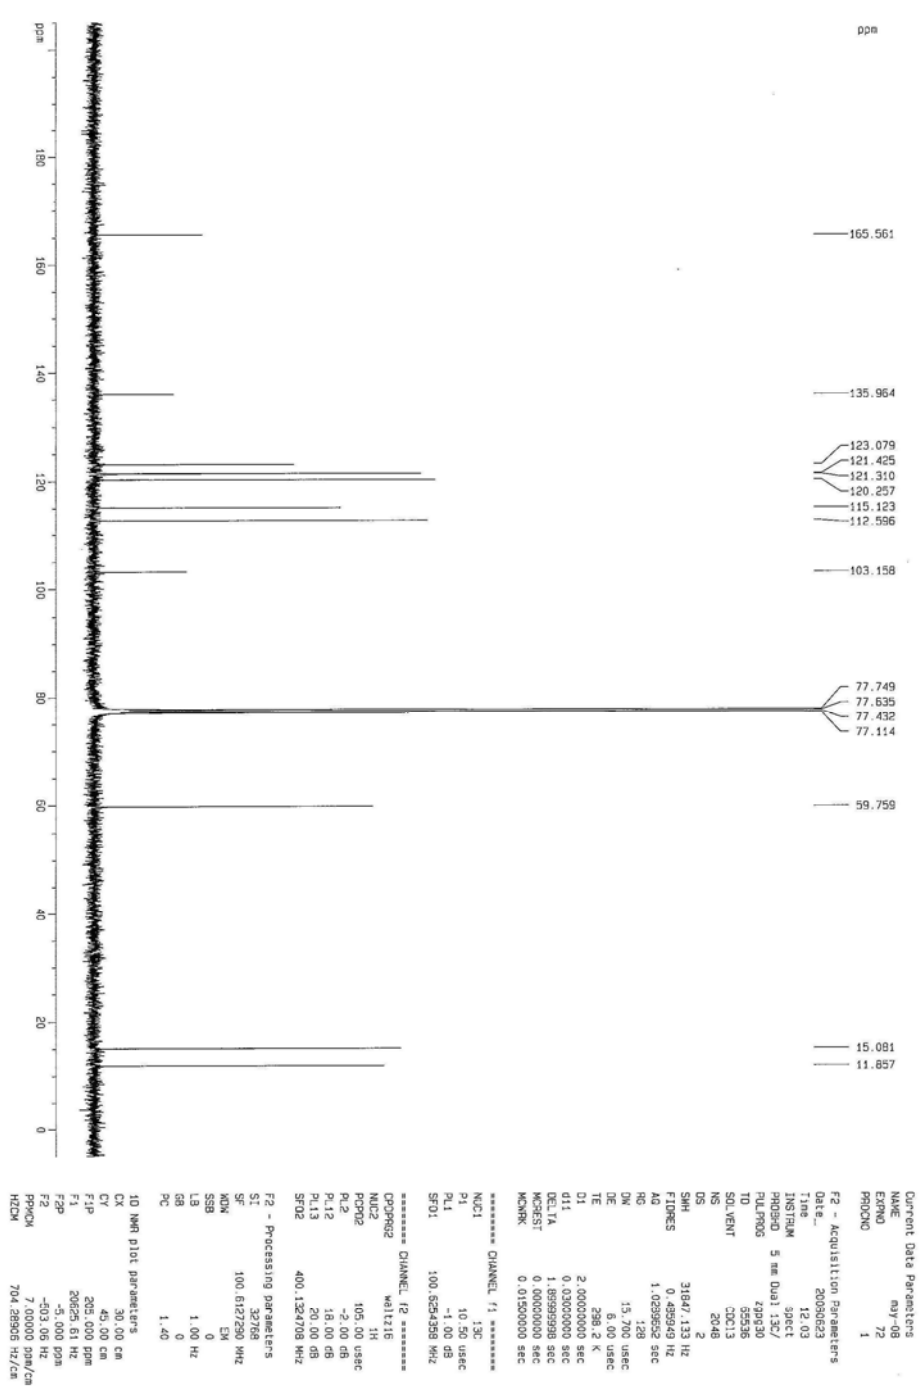

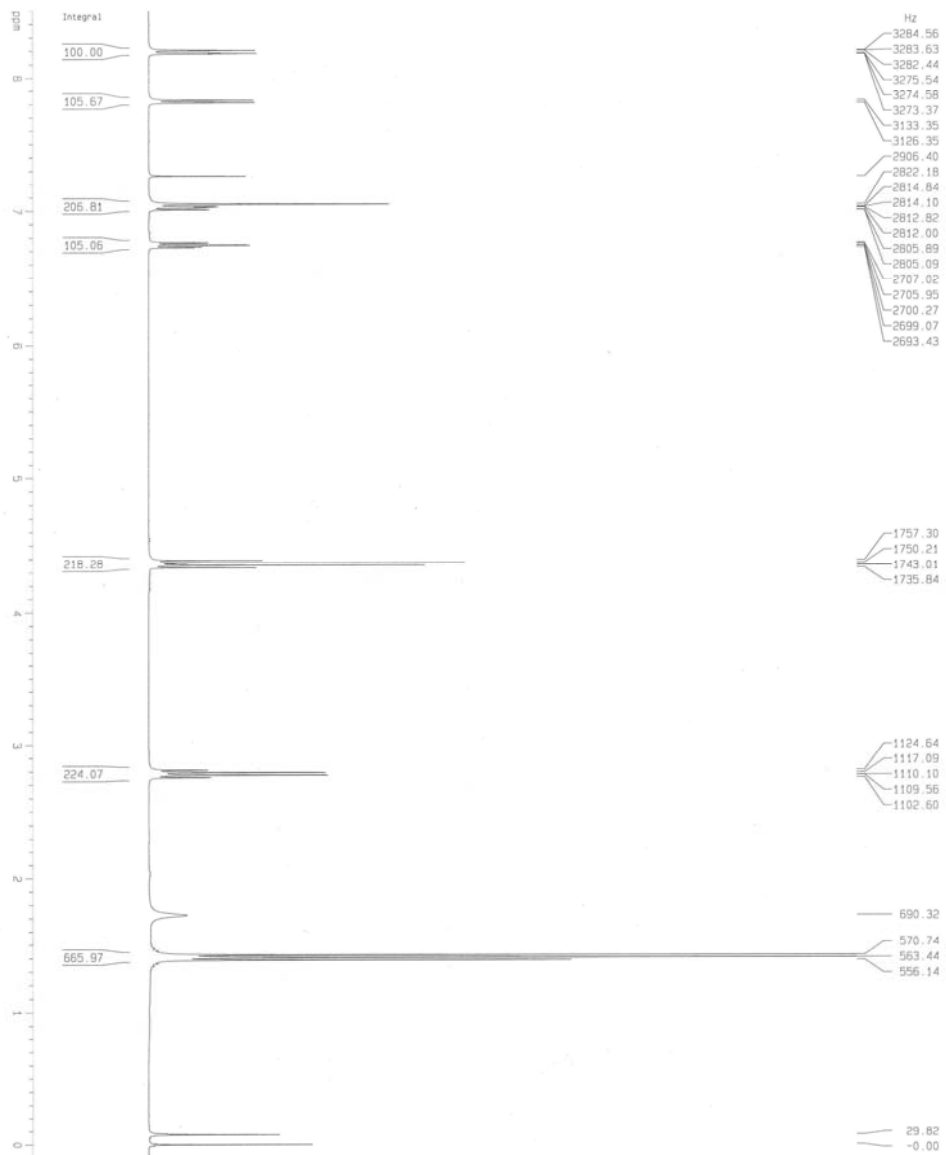

Current Data Parameters  
 NAME: roy-09  
 EXPNO: 29  
 PROCNO: 1

F2 - Acquisition Parameters  
 Date\_ : 20091120  
 Time: 16:22  
 INSTRUM: spect  
 PROBHD: 5 mm Dual 13C/  
 PULPROG: zg30  
 TO: 32768  
 SOLVENT: DMS-d6  
 NS: 32  
 DS: 0  
 SWH: 8223.689 Hz  
 FIDRES: 0.250967 Hz  
 AQ: 1.9823444 sec  
 RG: 203.2  
 DE: 60.800 usec  
 TE: 5.00 usec  
 D1: 2.95 sec  
 1.0000000 sec  
 0.1000000 sec  
 0.0100000 sec  
 0.0100000 sec

\*\*\*\*\* CHANNEL f1 \*\*\*\*\*  
 NUC1: 1H  
 P1: 11.00 usec  
 PL1: -2.00 dB  
 SFO1: 400.1324770 MHz

F2 - Processing parameters  
 SI: 15384  
 SF: 400.1300079 MHz  
 MDW: EM  
 SSB: 0  
 LB: 0.30 Hz  
 GB: 0  
 PC: 1.00

1D NMR Plot parameters:  
 CV: 0.00 cm  
 CY: 30.00 cm  
 F1P: 8.500 ppm  
 F1: 3401.10 Hz  
 F2P: -0.100 ppm  
 F2: -40.01 Hz  
 PPMCKM: 0.28667 ppm/cm  
 HZCKM: 114.70393 Hz/cm

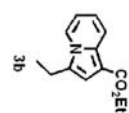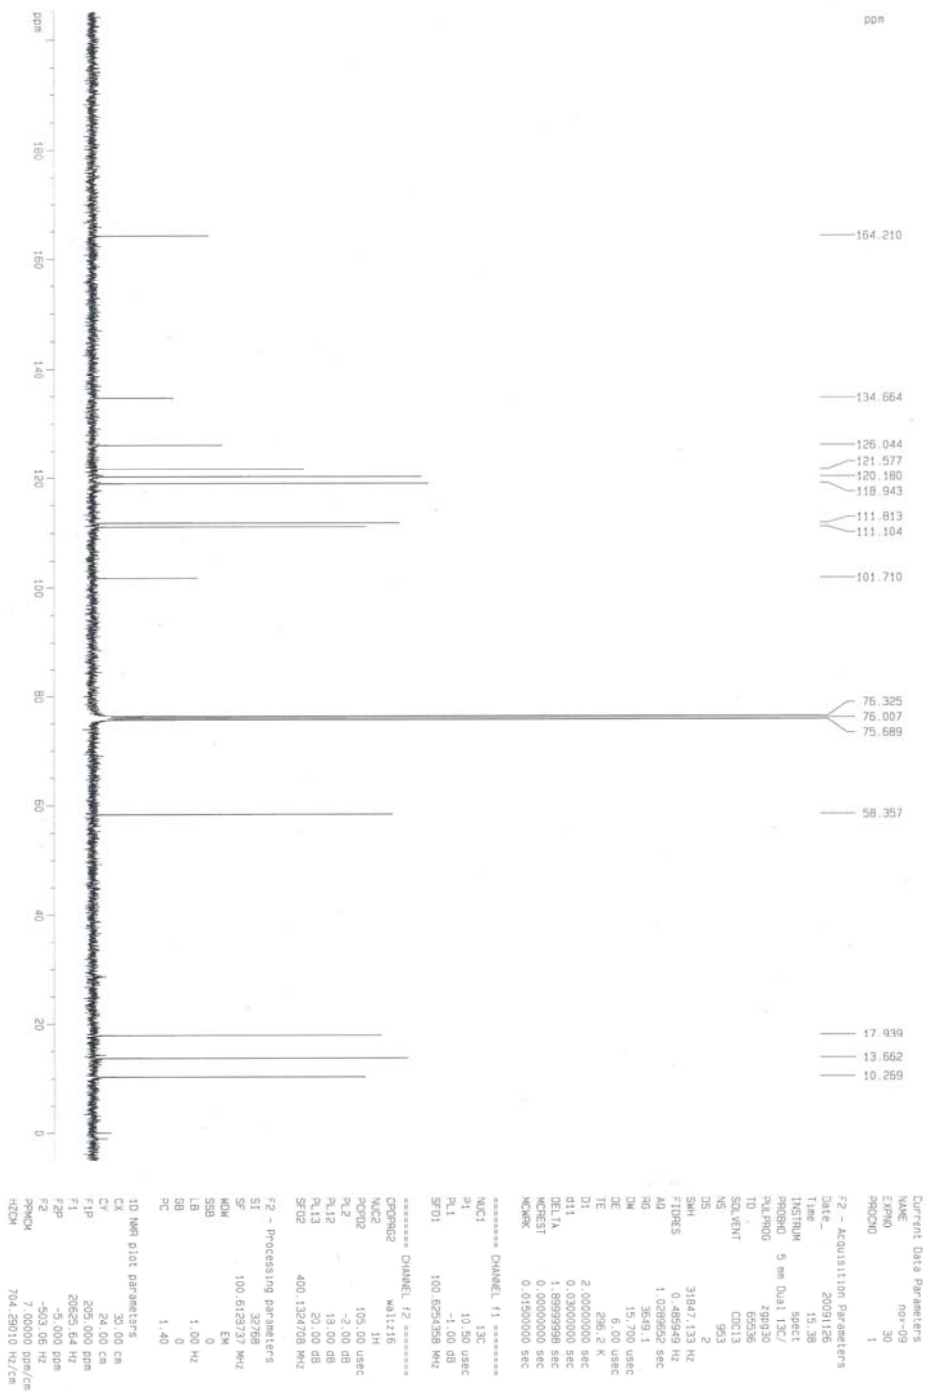

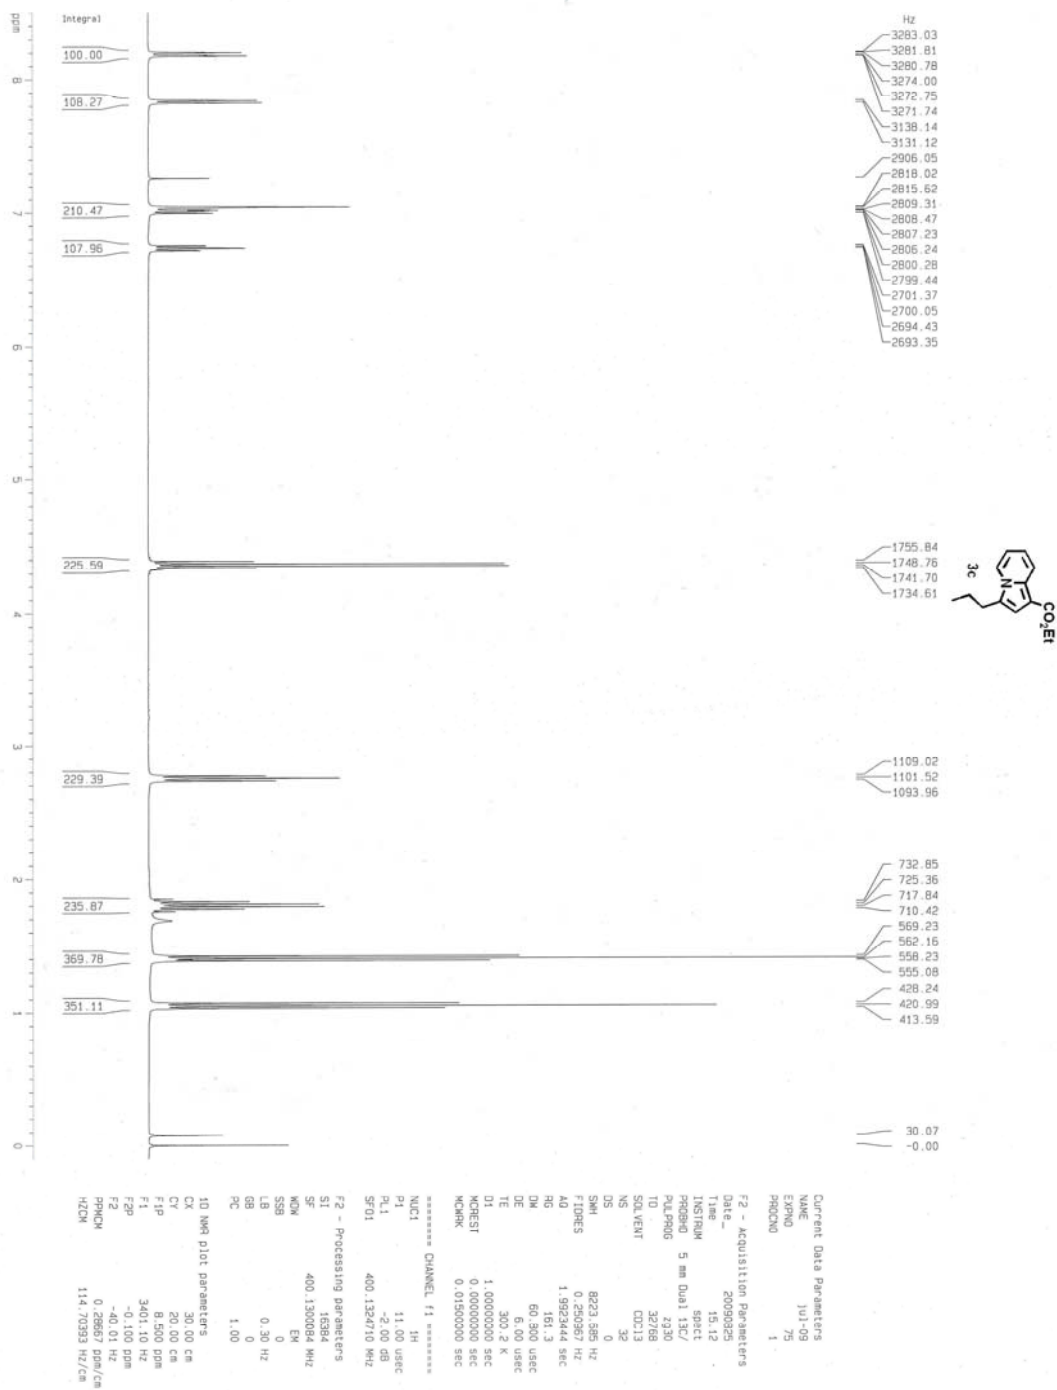



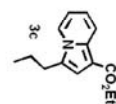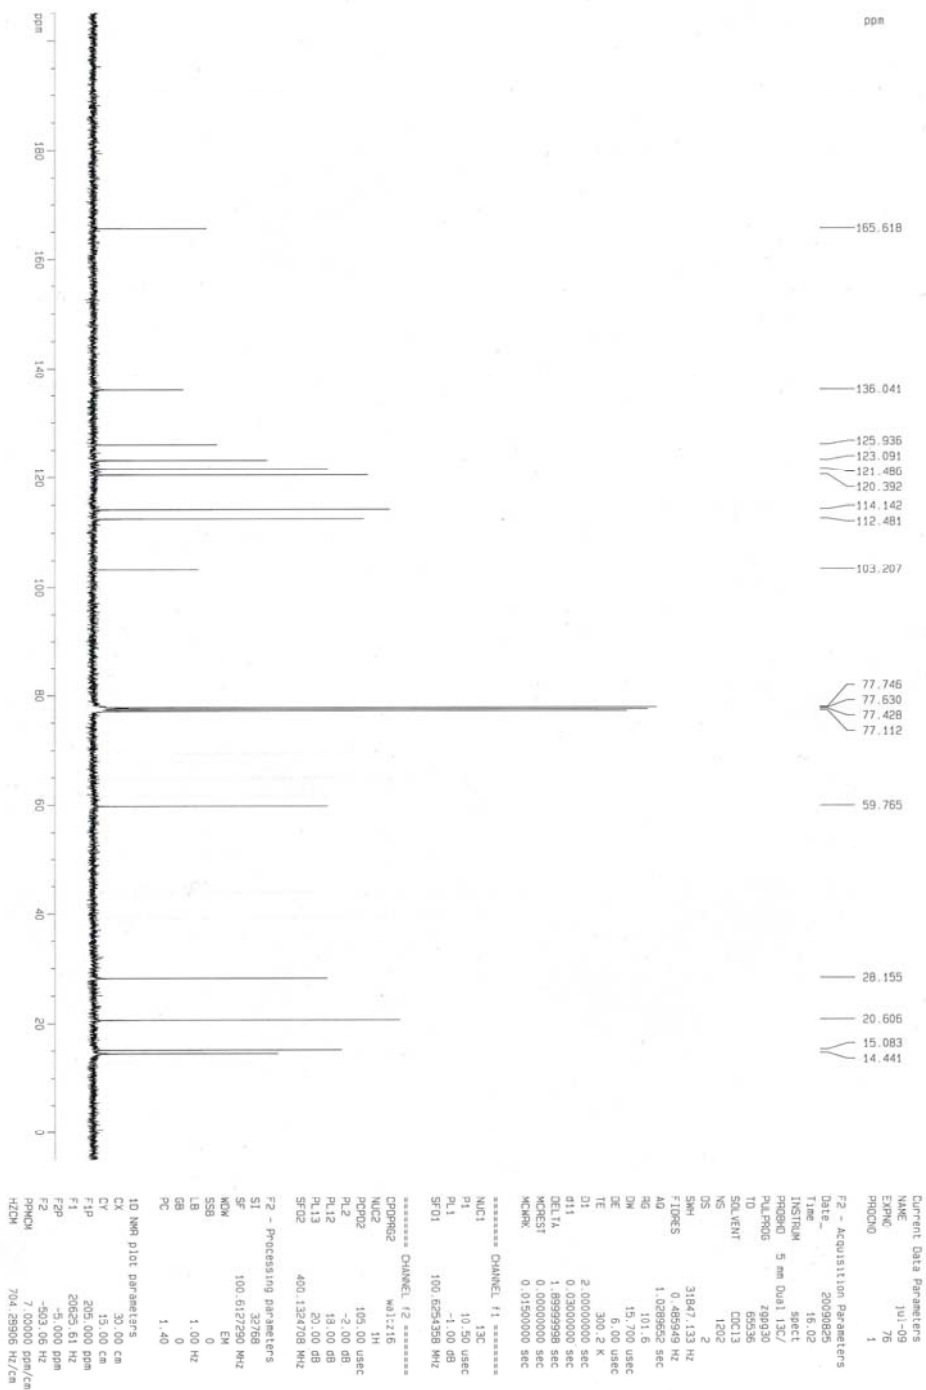

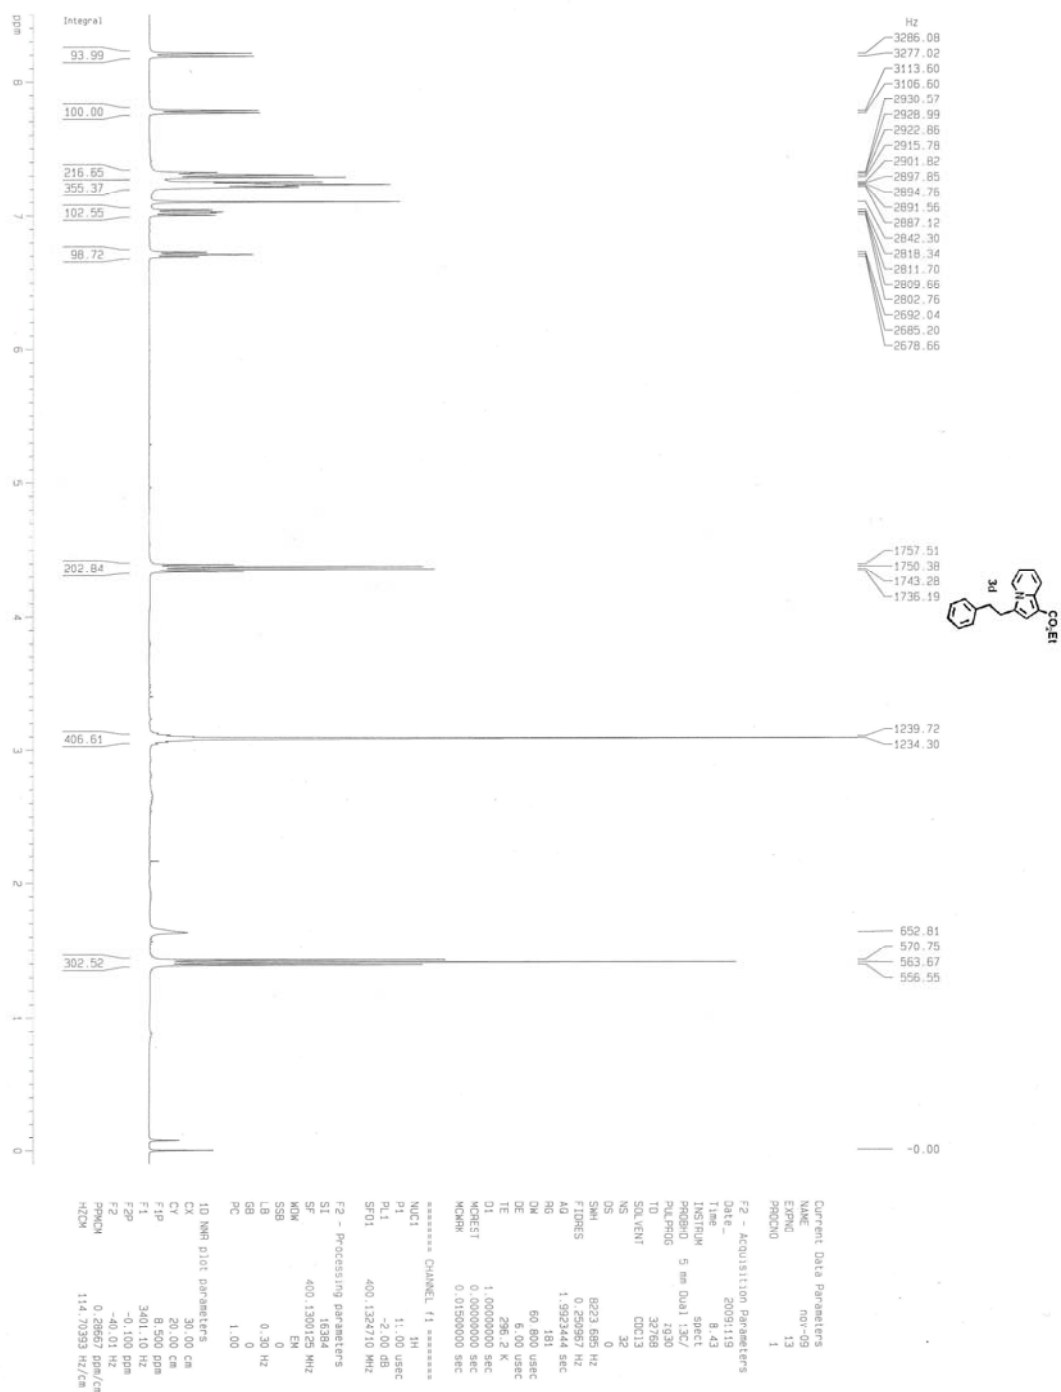

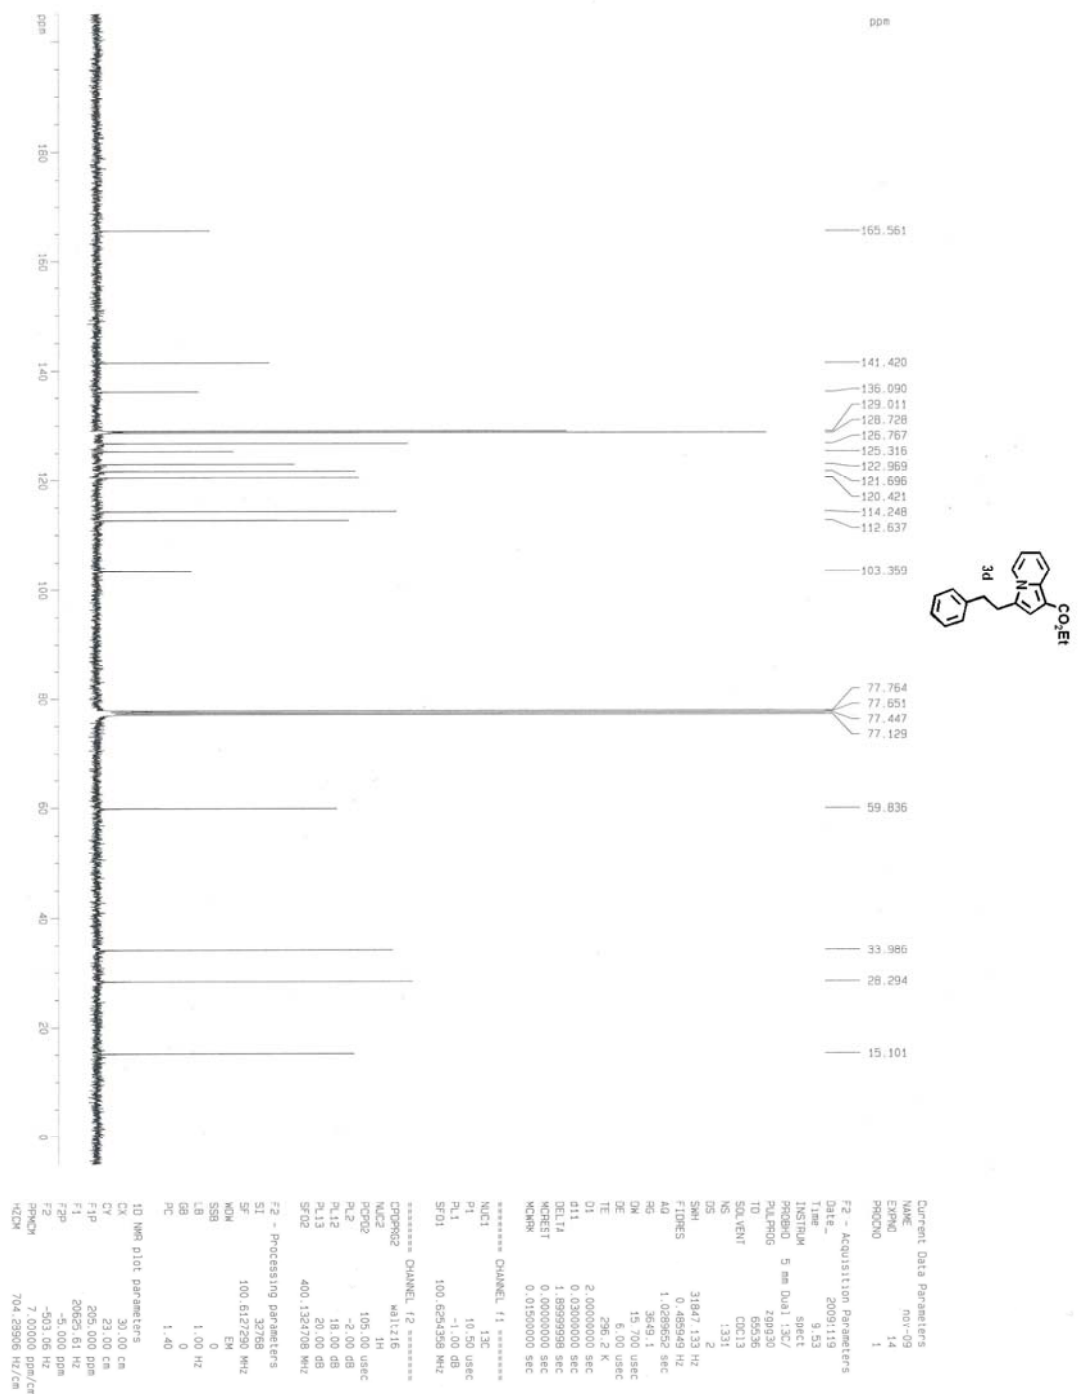

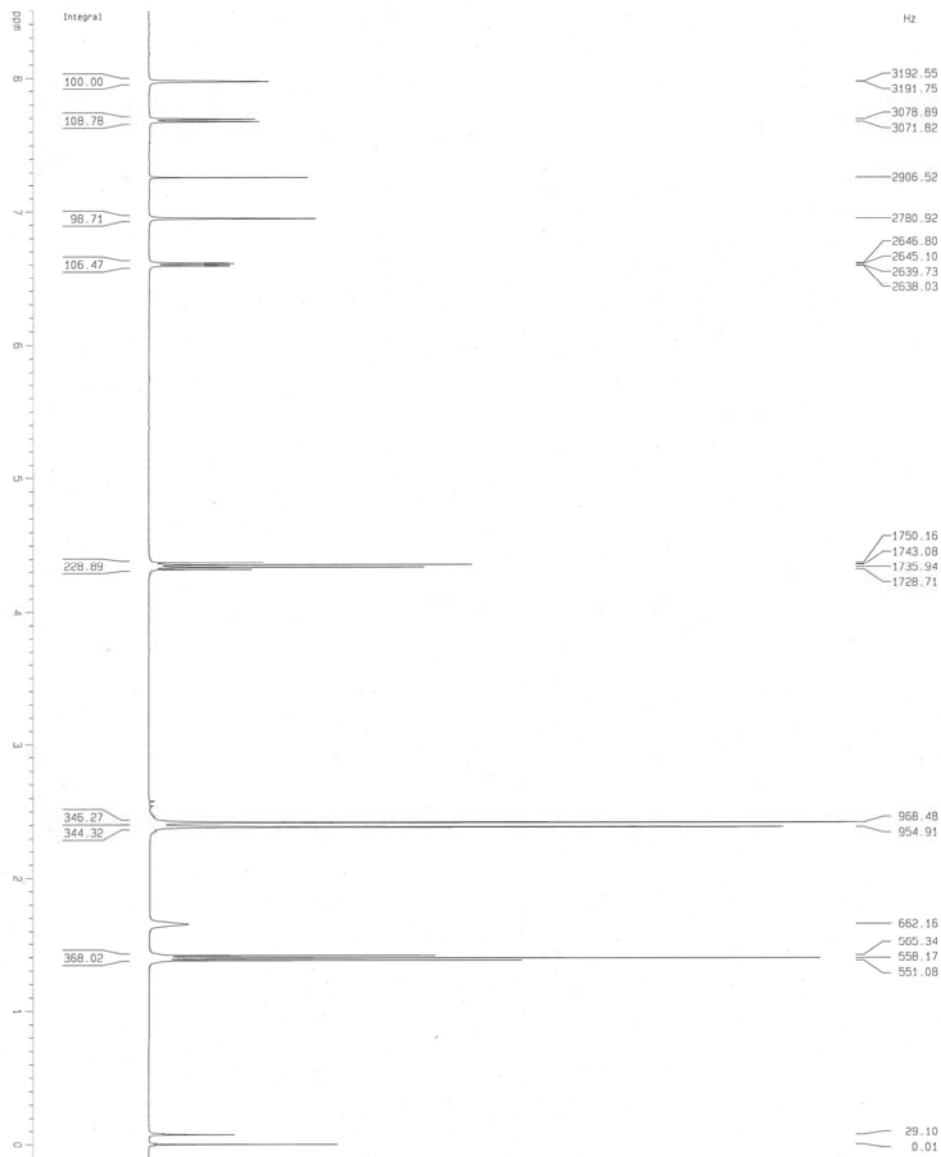

Current Data Parameters  
 NAME 1un-09  
 EXPNO 35  
 PROCNO 1

F2 - Acquisition Parameters  
 Date\_ 20090530  
 Time 18:43  
 INSTRUM spect  
 PROBHD 5 mm Dui 13C/  
 PULPROG zgpg30  
 TD 32768  
 SOLVENT DMS-d6  
 NS 32  
 DS 0  
 SMH 8223.688 Hz  
 FIDRES 0.250967 Hz  
 AQ 1.98234444 sec  
 RG 287.4  
 DE 60.800 usec  
 OE 6.00 usec  
 TE 297.2 K  
 DT 1.0000000 sec  
 ACQRES 0.0000000 sec  
 KWAVE 0.01500000 sec

\*\*\*\*\* CHANNEL f1 \*\*\*\*\*  
 NUC1 <sup>1</sup>H  
 P1 11.00 usec  
 PL1 -2.00 dB  
 SFO1 400.1324710 MHz

F2 - Processing parameters  
 SI 16384  
 SF 400.1300060 MHz  
 MDW EM  
 SSB 0  
 LB 0.30 Hz  
 GB 0  
 PC 1.00

1D NMR Plot Parameters  
 SI 60 cm  
 CV 20.00 cm  
 FIP 8.500 ppm  
 F1 3401.10 Hz  
 F2P -0.100 ppm  
 F2 -40.01 Hz  
 PPMCHK 0.28567 ppm/cm  
 HZCHK 114.70393 Hz/cm

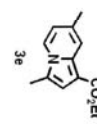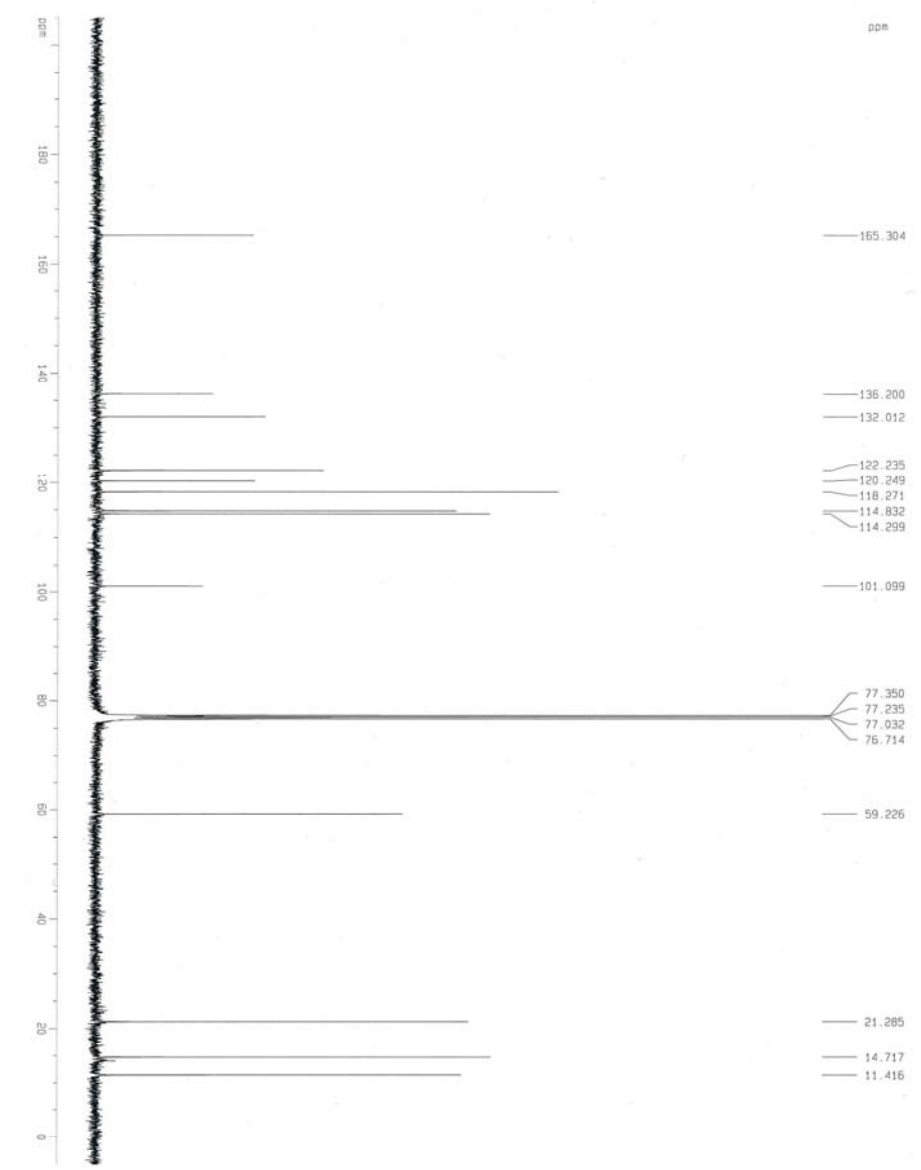

Current Data Parameters  
 NAME Jun-09  
 EXPNO 36  
 PROCNO 1

F2 - Acquisition Parameters  
 Date\_ 20090630  
 Time 23.09  
 INSTRUM spect  
 PROBO 5 mm Dual 13C/  
 PULPROG zgpg30  
 TO 69536  
 SOLVENT CDCl3  
 NS 5120  
 DS 2  
 SFO 31847.133 Hz  
 FIDPRES 0.46604 Hz  
 AQ 1.0288692 sec  
 RG 3643.1  
 DM 15.700 usec  
 DE 6.00 usec  
 TE 285.2 K  
 D1 2.00000000 sec  
 d11 0.03000000 sec  
 DELTA 1.89999998 sec  
 MCREST 0.00000000 sec  
 MCMR 0.01500000 sec

\*\*\*\*\* CHANNEL f1 \*\*\*\*\*  
 NU1 13C  
 P1 10.50 usec  
 PL1 -1.00 dB  
 SF01 100.6254359 MHz

\*\*\*\*\* CHANNEL f2 \*\*\*\*\*  
 CPOPRG2 waltz16  
 NU2 1H  
 P1 105.00 usec  
 PL2 -2.00 dB  
 PL12 18.00 dB  
 PL13 20.00 dB  
 SF02 400.1324708 MHz

F2 - Processing parameters  
 SI 32758  
 SF 100.6127694 MHz  
 MDW EM  
 SSB 0  
 LB 1.00 Hz  
 GB 0  
 PC 1.40

1D NMR plot parameters  
 CX 20.00 cm  
 CY 50.00 cm  
 F1P 205.000 ppm  
 F1 20625.62 Hz  
 F2P -5.000 ppm  
 F2 -503.06 Hz  
 PPMCH 7.00000 ppm/cm  
 HZCH 704.28937 Hz/cm

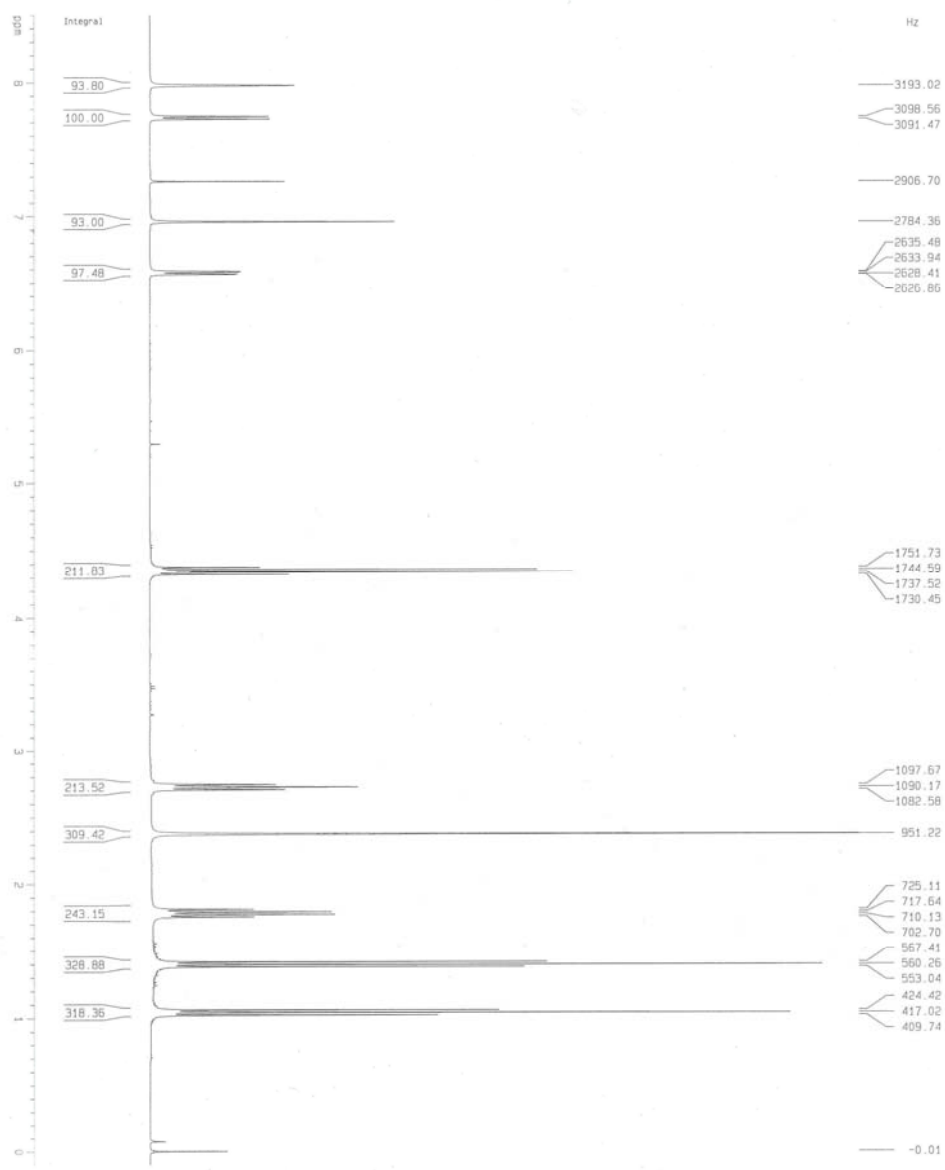

Current Data Parameters

NAME nov-09  
 EXPNO 15  
 PROCNO 1

F2 - Acquisition Parameters

DATE\_ 2009119  
 TIME 10:00  
 INSTRUM spect  
 PULPROG zgpg30  
 TD 32768  
 SOLVENT CDCl3  
 NS 32  
 DS 0  
 SMH 8223.658 Hz  
 FIDRES 0.250967 Hz  
 AQ 1.5923444 sec  
 RG 203.2  
 DW 60.800 usec  
 DE 6.00 usec  
 TE 296.2 K  
 D1 1.0000000 sec  
 ACQRES 0.0000000 sec  
 MNAME 0.01500000 sec

\*\*\*\*\* CHANNEL f1 \*\*\*\*\*

NUC1 1H  
 P1 11.00 usec  
 PL1 -2.00 dB  
 SF01 400.1324710 MHz

F2 - Processing parameters

SI 16384  
 SF 400.1300077 MHz  
 MDM EM  
 SSB 0  
 LB 0.30 Hz  
 GB 0  
 PC 1.00

1D NMR plot parameters

CH 30.00 cm  
 C 20.00 cm  
 F1P 8.6500 cm  
 F1 3401.10 Hz  
 F2P -0.100 dB  
 F2 -40.01 Hz  
 SFOCK 0.28667 ppm/cm  
 HZCK 114.70393 Hz/cm

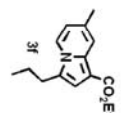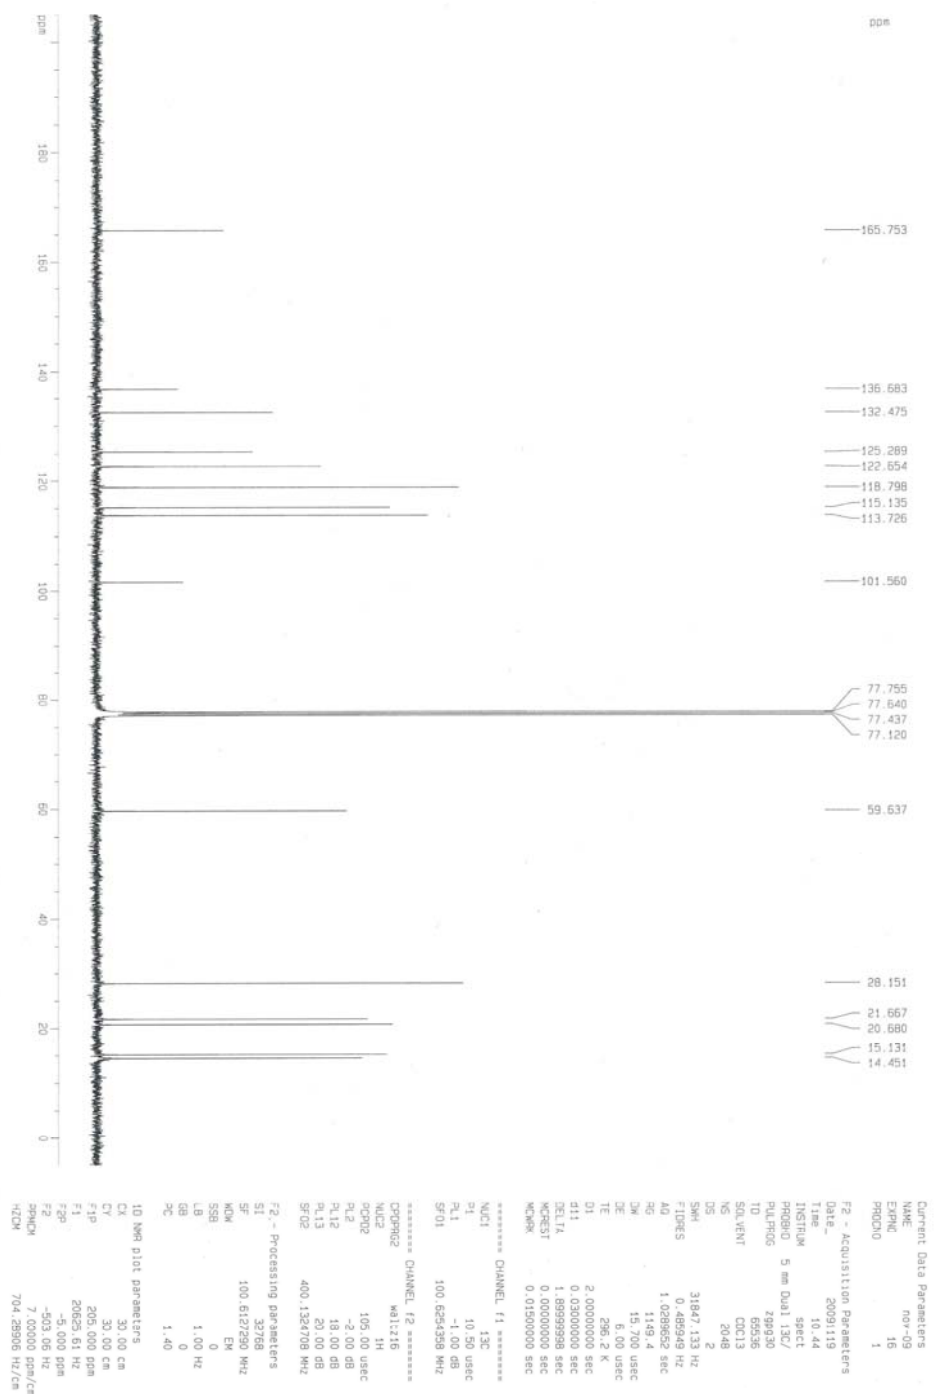

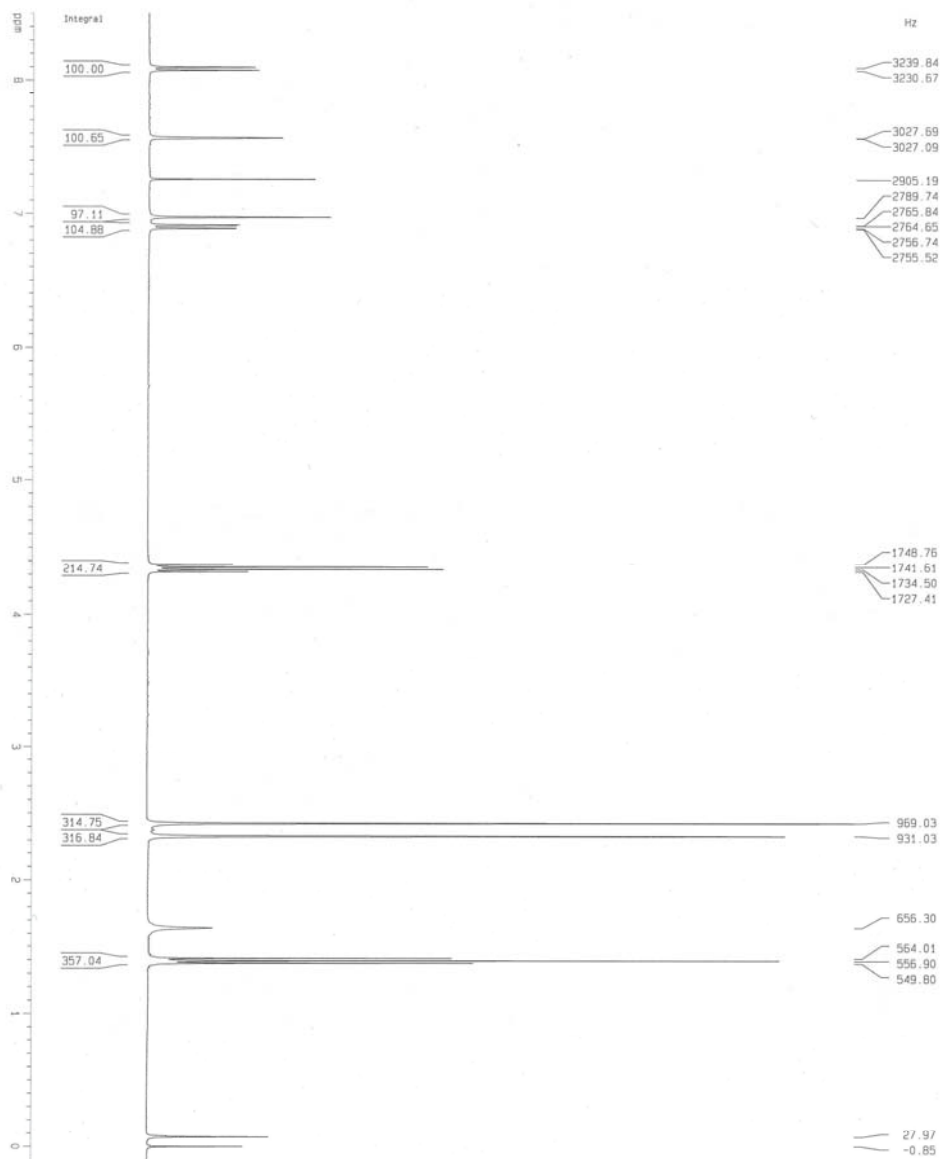

Current Data Parameters  
 NAME Jun-09  
 EXPNO 45  
 PROCNO 1

F2 - Acquisition Parameters  
 Date\_ 20090703  
 Time 11.09  
 INSTRUM spect  
 PROBHD 5 mm Dual 13C/  
 PULPROG zgpg30  
 TD 65536  
 SFO1 125.761  
 SOLVENT CDCl3  
 NS 1024  
 DS 4  
 SWH 8223.866 Hz  
 FIDRES 0.250367 Hz  
 AQ 1.992444 sec  
 RG 287.4  
 CM 60.800 usec  
 DE 5.00 usec  
 TE 296.2 K  
 D1 1.00000000 sec  
 ACQRES 0.00000000 sec  
 KWAVE 0.01500000 sec

\*\*\*\*\* CHANNEL f1 \*\*\*\*\*  
 NUC1 13C  
 P1 11.00 usec  
 PL 0.00 dB  
 SFO1 400.1324710 MHz

F2 - Processing parameters  
 SI 16384  
 SF 400.1300092 MHz  
 KW EM  
 SSB 0  
 LB 0.30 Hz  
 GB 0  
 PC 1.00

1D NMR Plot Parameters  
 CX 30.00 cm  
 CY 20.00 cm  
 FIP 8.500 dpm  
 F1 3401.10 Hz  
 F2P -0.100 dpm  
 F2 40.01 Hz  
 SFO1CM 0.26903 dpm/cm  
 SFO2CM 114.70353 Hz/cm



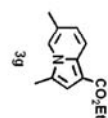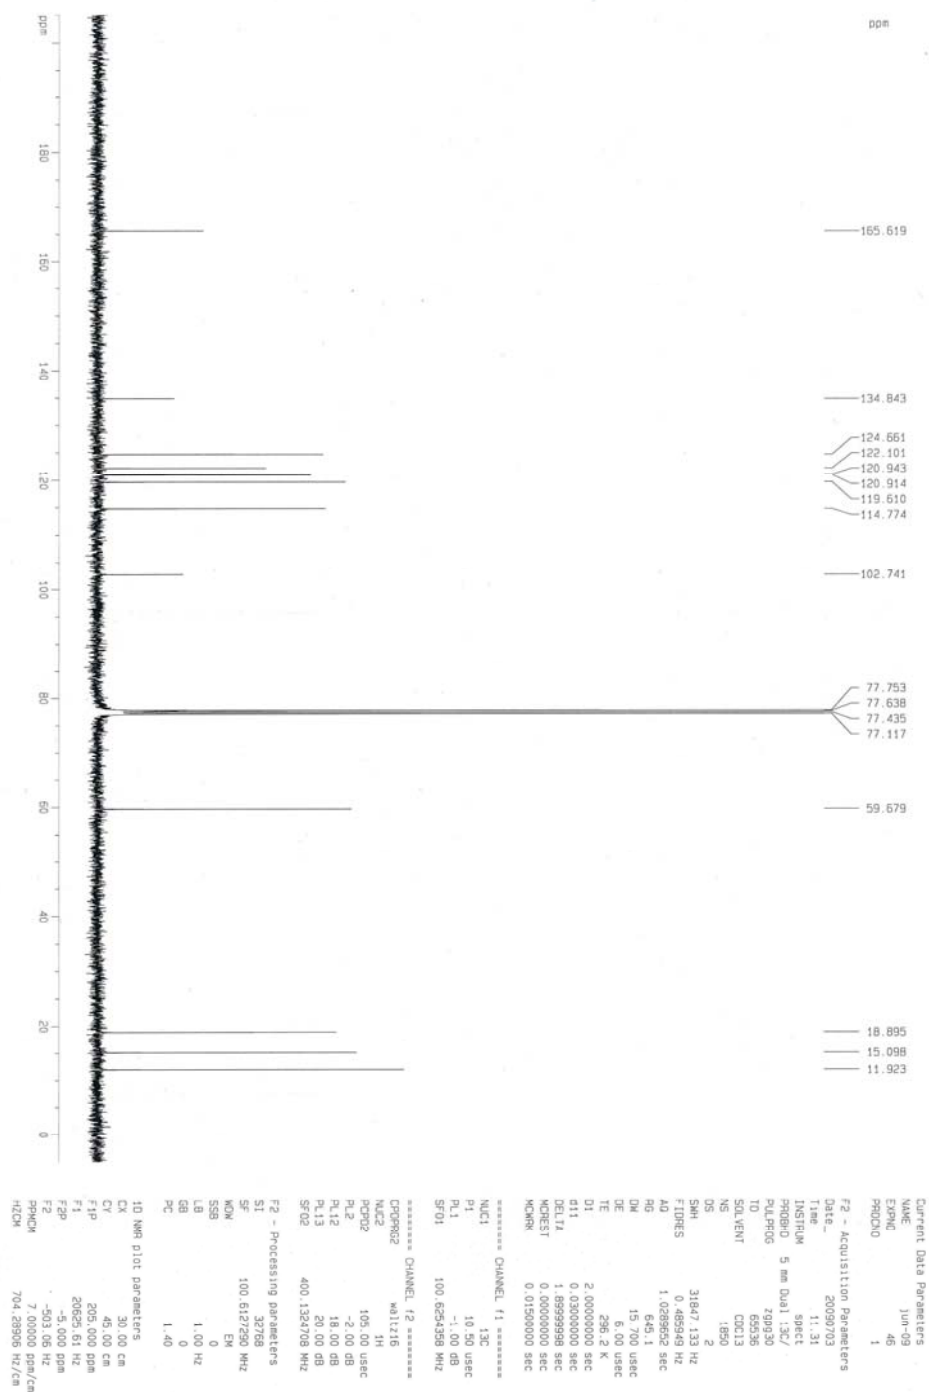

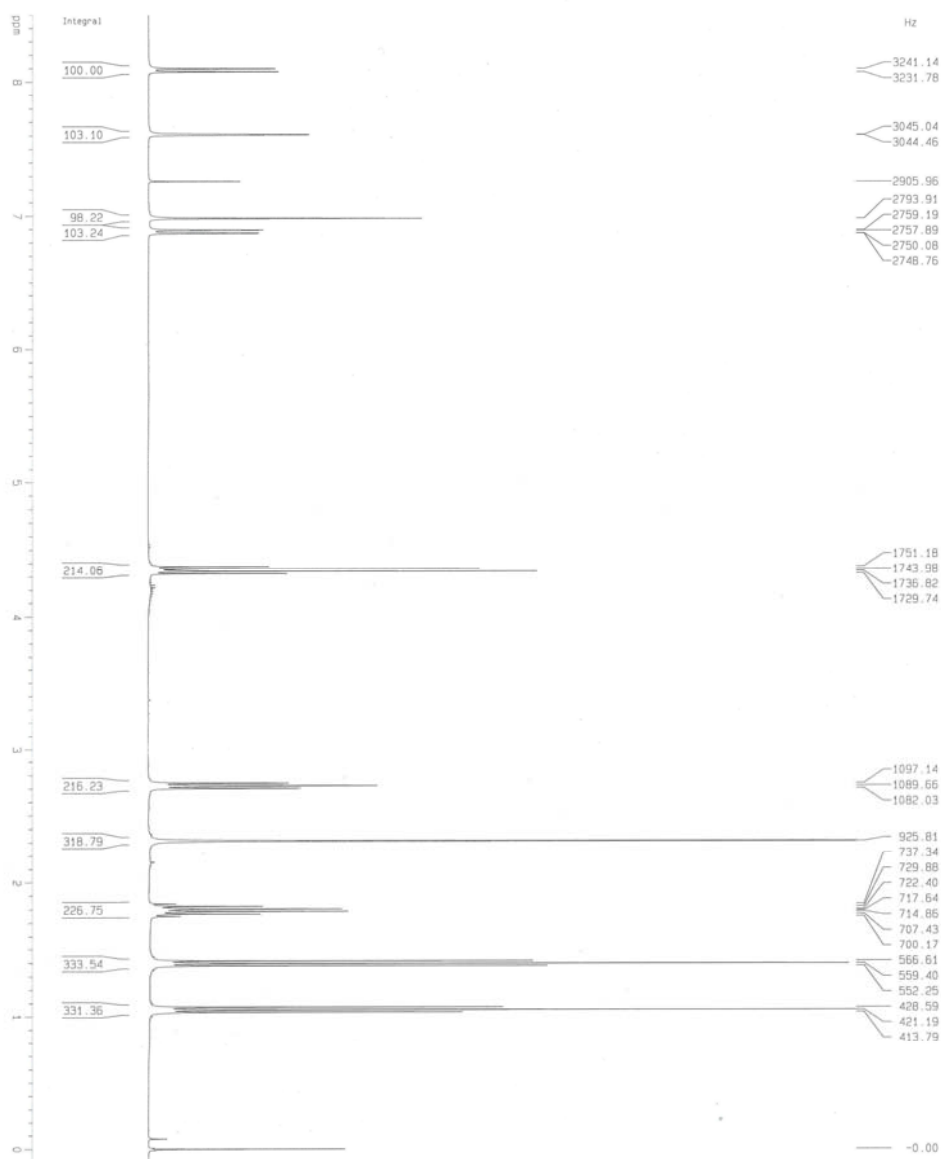

Current Data Parameters  
 NAME nov-09  
 EXPNO 31  
 PROCNO 1

F2 - Acquisition Parameters  
 Date\_ 2009120  
 Time 19:29  
 INSTRUM spect  
 PROBD 5 mm Dui1 13C/  
 PULPROG zgpg30  
 TD 32768  
 SOLVENT DMS-d6  
 NS 32  
 DS 0  
 SMH 8223.689 Hz  
 FIDRES 0.256967 Hz  
 AQ 1.9923444 sec  
 RG 143.7  
 DE 60.800 usec  
 TE 295.2 K  
 D1 1.00000000 sec  
 D11 0.00000000 sec  
 ACQRES 0.01500000 sec  
 K0P00

\*\*\*\*\* CHANNEL f1 \*\*\*\*\*  
 NUC1 H1  
 P1 11.00 usec  
 PL1 -2.00 dB  
 SF01 400.1324710 MHz

F2 - Processing parameters  
 SI 15384  
 SF 400.1300094 MHz  
 MDM EM  
 SSB 0  
 LB 0.30 Hz  
 GB 0  
 PC 1.00

1D NMR plot parameters  
 SI 32768  
 CF 50.00 cm  
 C1 2.00 cm  
 F1P 8.500 GHz  
 F1 3401.10 Hz  
 F2P -40.100 GHz  
 F2 -40.01 Hz  
 HZCM 0.28667 GHz/cm  
 HZCK 114.70393 Hz/cm

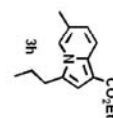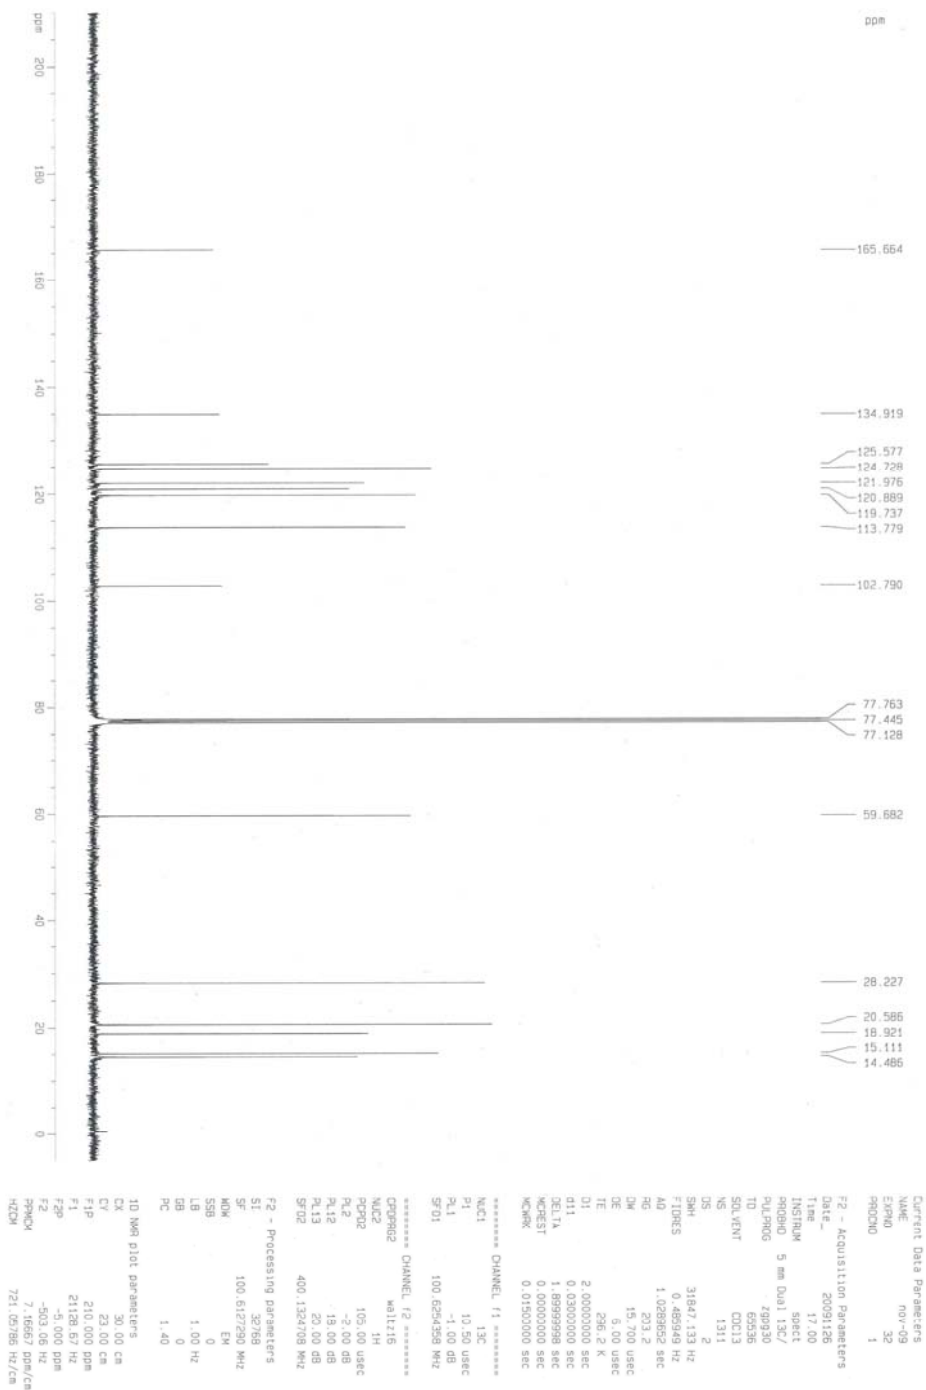

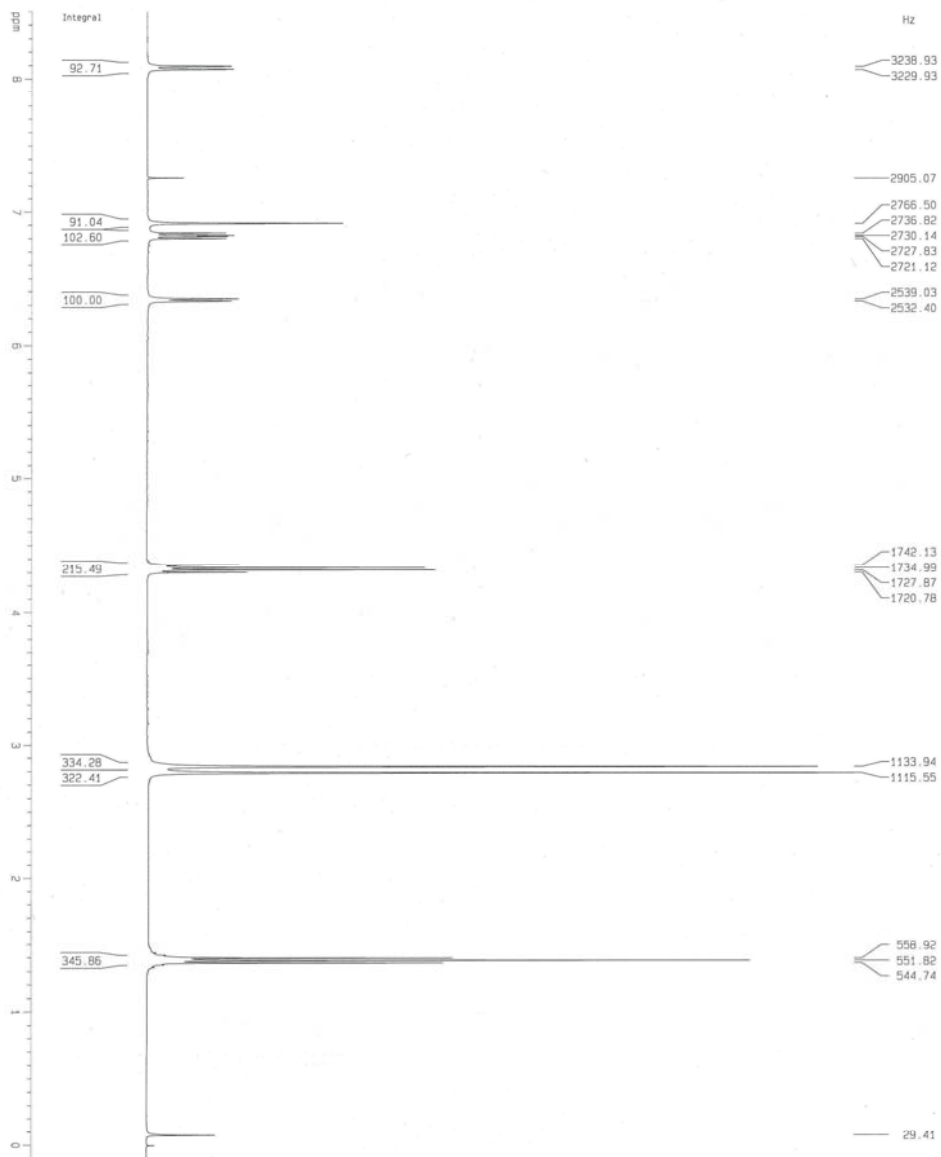

Current Data Parameters  
 NAME Jun-09  
 EXPRC 47  
 PROCNO 1

F2 - Acquisition Parameters  
 Date\_ 2009/03  
 Time 13.33  
 INSTRUM spect  
 PULPROG 5 mm QNP1 13C/1  
 PROBHD 5 mm QNP1 13C/1  
 TD 32768  
 SOLVENT CDCl3  
 NS 32  
 DS 0  
 SMH 8223.666 Hz  
 FIDRES 0.256967 Hz  
 AQ 1.9923444 sec  
 RG 114  
 DW 60.800 usec  
 DE 6.00 usec  
 TE 296.2 K  
 D1 1.00000000 sec  
 WPREST 0.00000000 sec  
 MCRM 0.01500000 sec

\*\*\*\*\* CHANNEL f1 \*\*\*\*\*  
 NUC1 <sup>1</sup>H  
 P1 11.00 usec  
 PL1 -2.00 dB  
 SF01 400.132710 MHz

F2 - Processing parameters  
 SI 15384  
 SF 400.1300092 MHz  
 MDW EM  
 SSB 0  
 LB 0.30 Hz  
 GB 0  
 PC 1.00

10 NMR PLOT PARAMETERS  
 EX 30.00 cm  
 CI 20.00 cm  
 F1P 81.500 MHz  
 F2P 340.100 MHz  
 F2 -40.01 Hz  
 PPMICK 0.28667 ppm/cm  
 HZCM 114.70393 Hz/cm

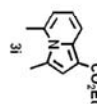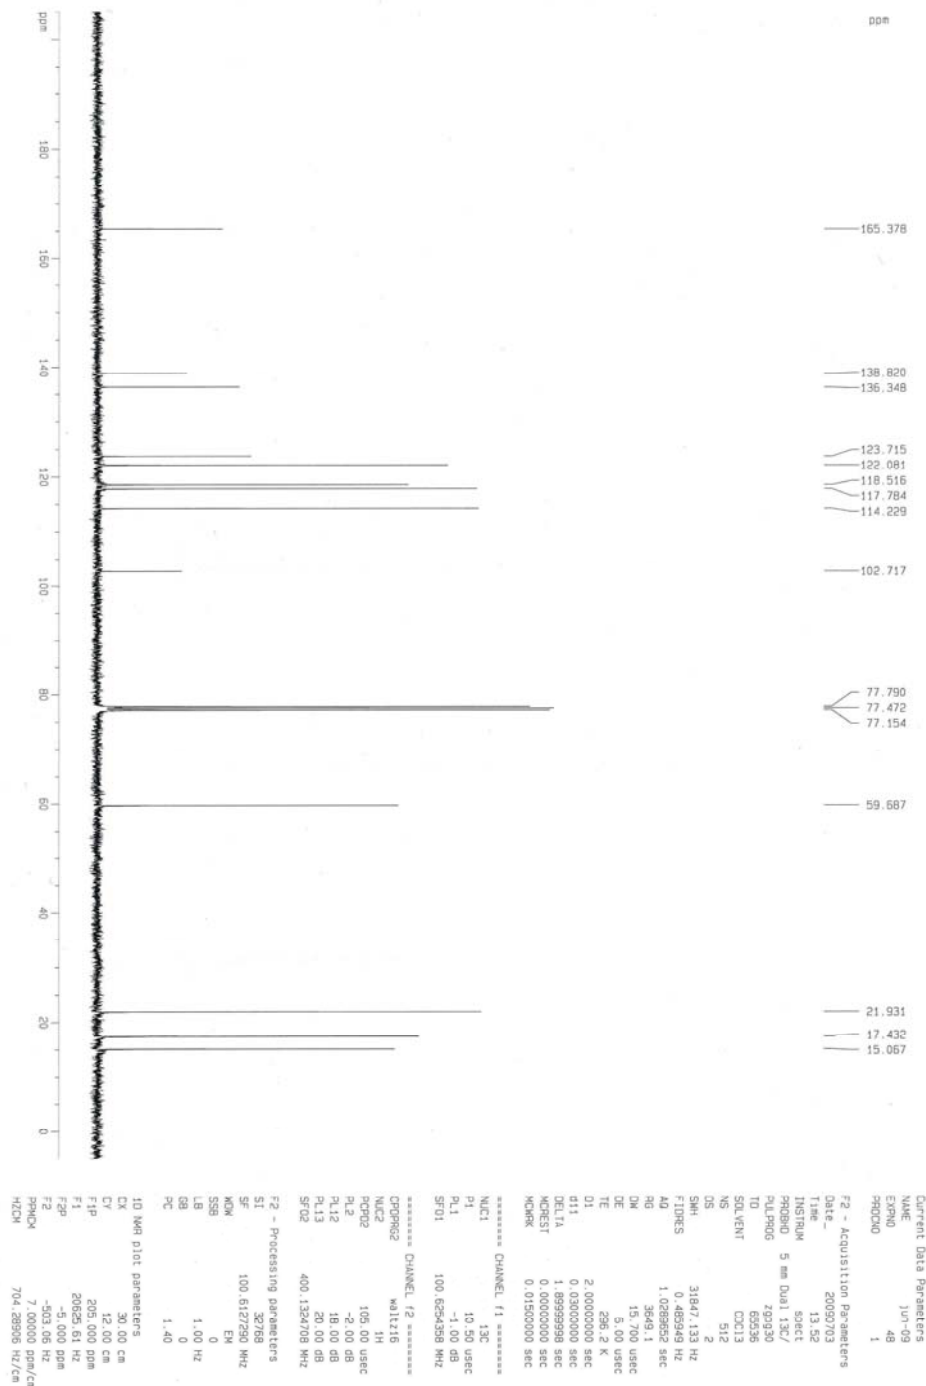

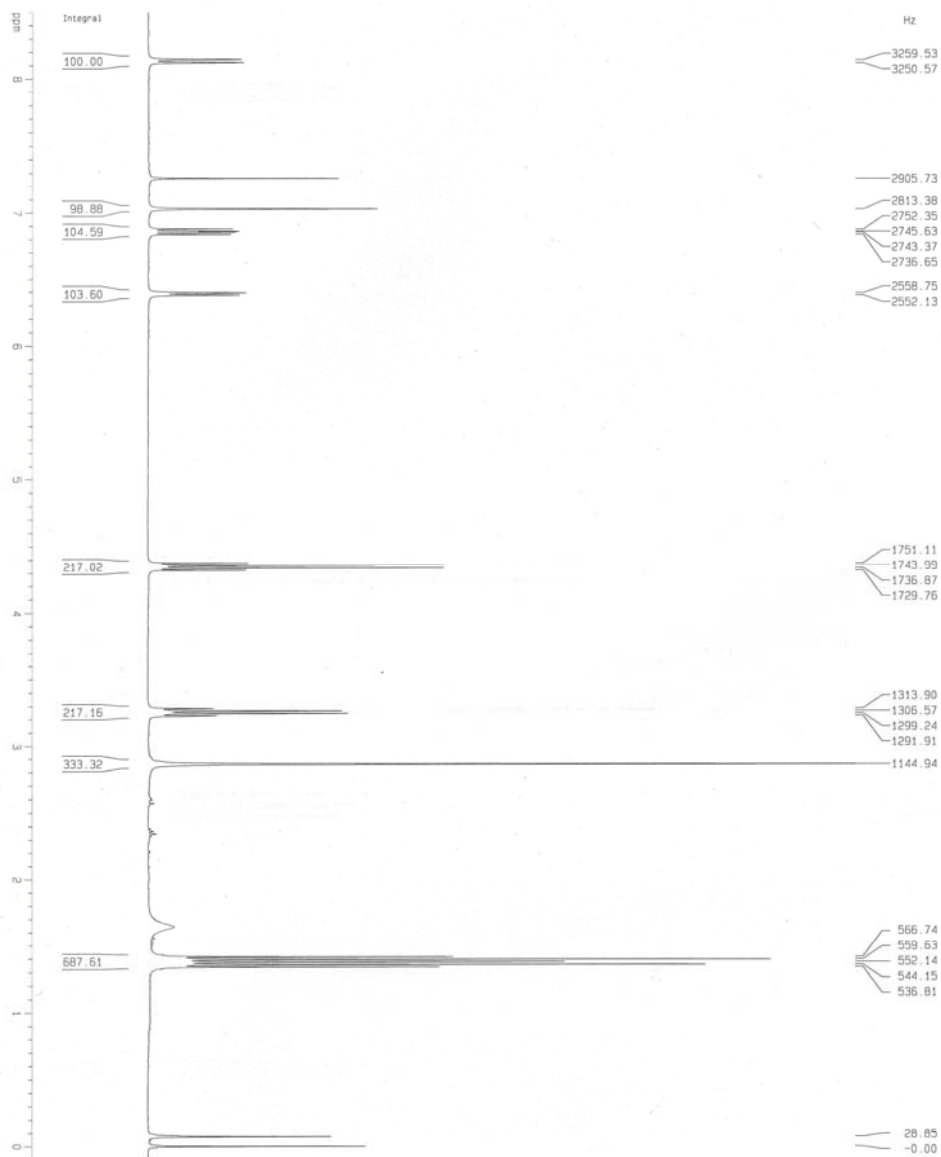

Current Data Parameters  
 NAME 1un-09  
 EXPNO 71  
 PROCNO 1

F2 - Acquisition Parameters  
 Date\_ 2009/09  
 Time 21:55  
 File 1un-09  
 PROBHD 5 mm QNP1  
 PULPROG zgpg30  
 TD 32768  
 SOLVENT DMS-d6  
 NS 32  
 DS 0  
 SMH 8223.666 Hz  
 AQ 0.250567 Hz  
 FIDRES 1.9923444 Hz  
 RG 287.4  
 DE 60.800 usec  
 TE 296.2 K  
 O1 1.00000000 sec  
 ACQRES 0.00000000 sec  
 MKMK 0.01500000 sec

\*\*\*\*\* CHANNEL f1 \*\*\*\*\*  
 NUC1 13C  
 P1 11.00 usec  
 PL1 -2.00 dB  
 SFO1 400.1324710 MHz

F2 - Processing parameters  
 SI 16384  
 SF 400.1300066 MHz  
 MCM EM  
 SSB 0  
 LB 0.30 Hz  
 GB 0  
 PC 1.00

1D NMR Plot Parameters  
 CH 30.00 cm  
 CR 20.00 cm  
 FIP 8.500 ppm  
 F1 3401.10 Hz  
 F2P -40.100 ppm  
 F2 -40.01 Hz  
 FPNCH 0.28667 ppm/cm  
 HZCH 114.70393 Hz/cm

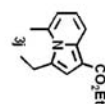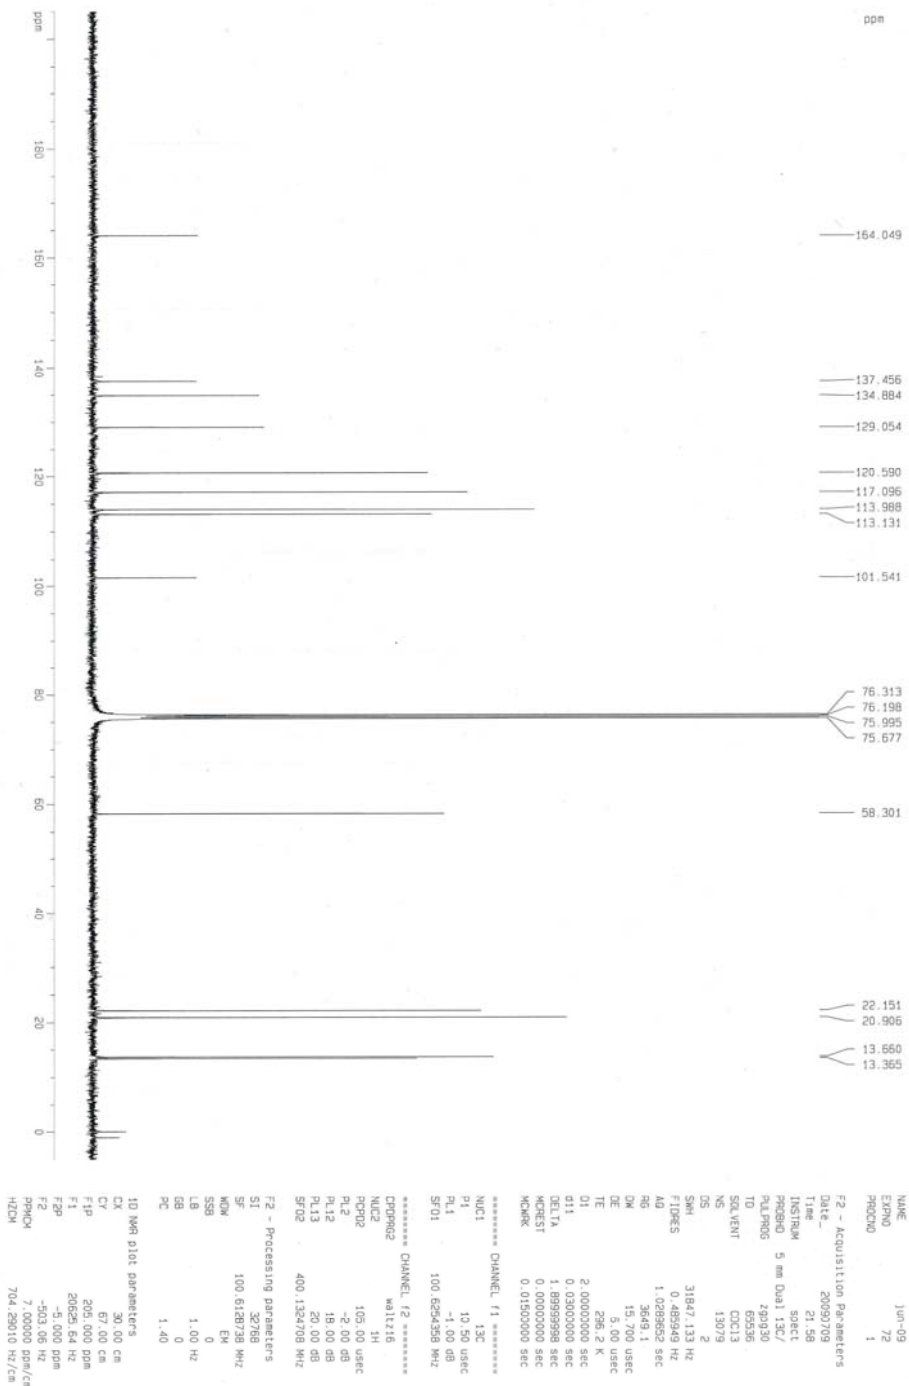

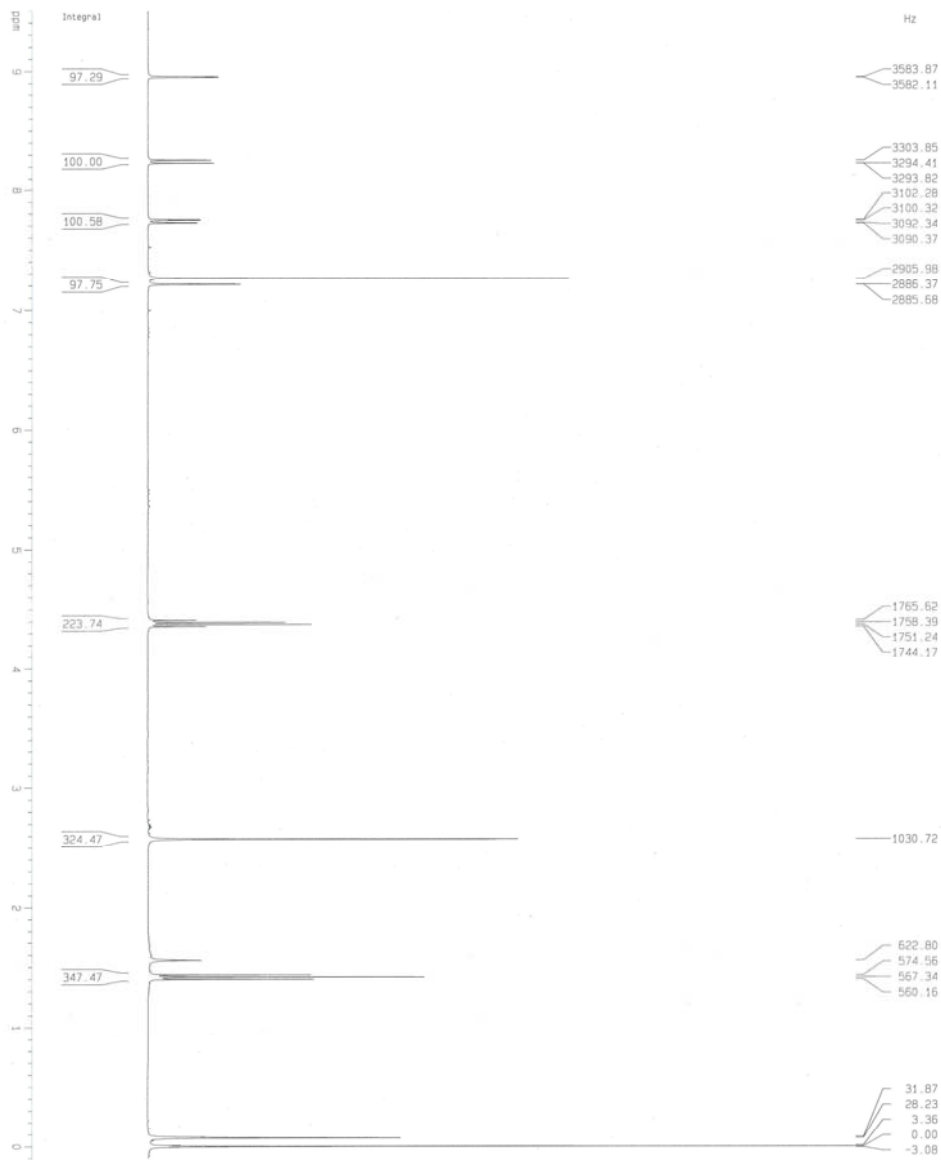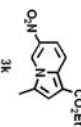

Current Data Parameters  
 NAME nov-09  
 EXPNO 33  
 PROCNO 1

F2 - Acquisition Parameters  
 Date\_ 20091126  
 Time 13:16  
 INSTRUM spect  
 PULPROG zgpg30  
 PU1PRG2 zg30  
 TD 32768  
 SFO1 400.1324710 MHz  
 NS 32  
 DS 0  
 OS 0  
 SM1 8223.686 Hz  
 FIDRES 0.2505967 Hz  
 AQ 1.9923444 sec  
 RG 812.7  
 DM 60.800 usec  
 DE 5.00 usec  
 TE 296.2 K  
 D1 1.00000000 sec  
 MDELST 0.00000000 sec  
 MDMN 0.01000000 sec

\*\*\*\*\* CHANNEL f1 \*\*\*\*\*  
 NU1 1H  
 P1 11.00 usec  
 PL1 -2.00 dB  
 SFO1 400.1324710 MHz

F2 - Processing parameters  
 SI 15384  
 SF 400.1300085 MHz  
 MDL EM  
 SSB 0  
 LB 0.30 Hz  
 GB 0  
 PC 1.00

1D NMR D1 parameters  
 CH 30.00 cm  
 CR 30.00 cm  
 F1P 6.500000 MHz  
 F1 3801.24 Hz  
 F2P -0.100000 MHz  
 F2 -40.01 Hz  
 PPMCK 0.320000 ppm/cm  
 HZCK 128.04161 Hz/cm



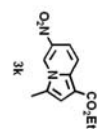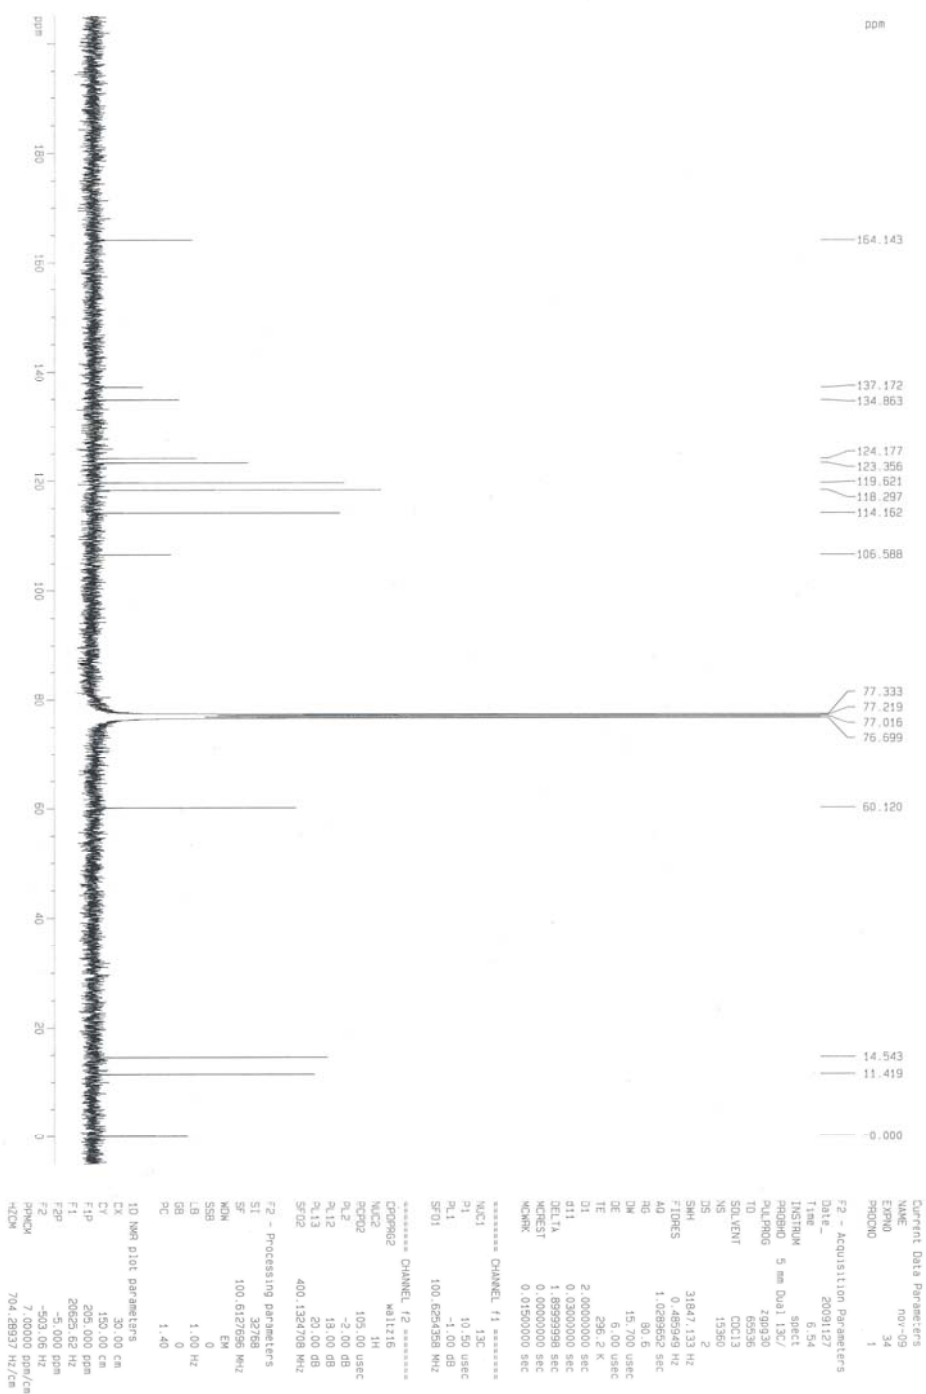

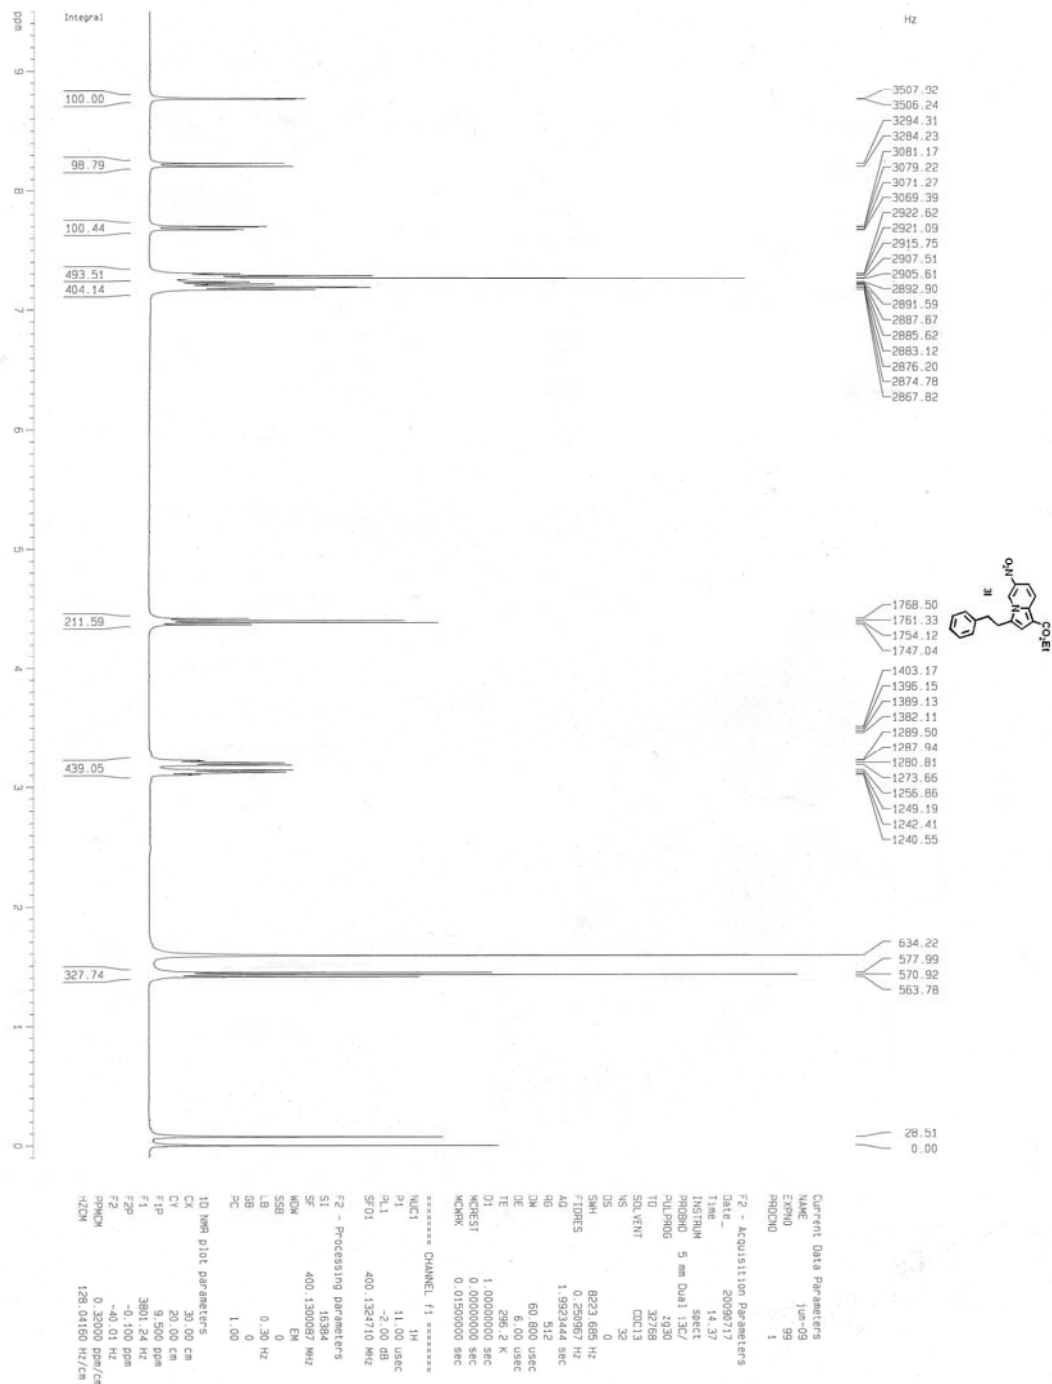

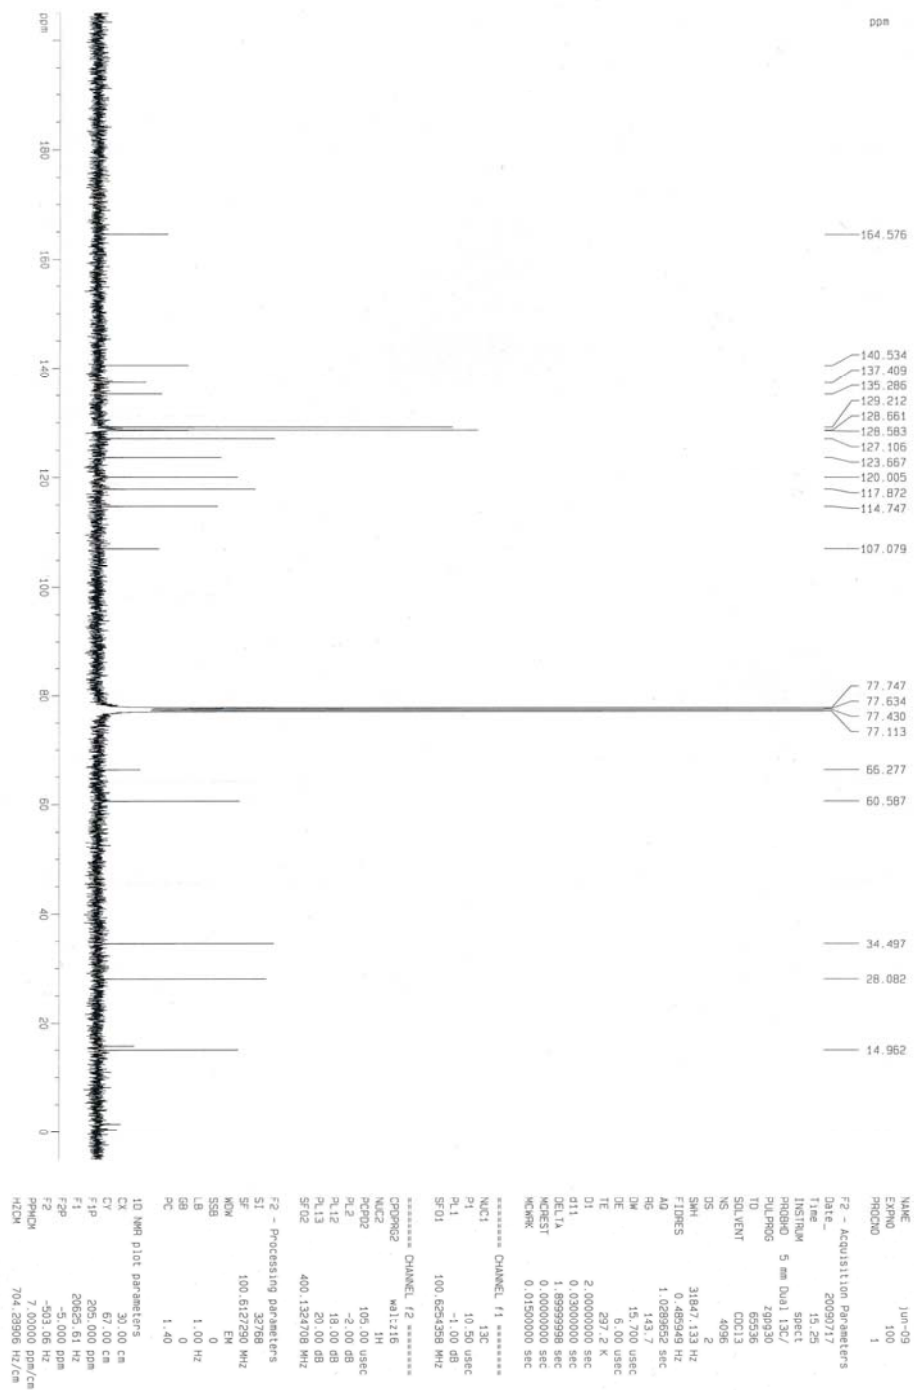

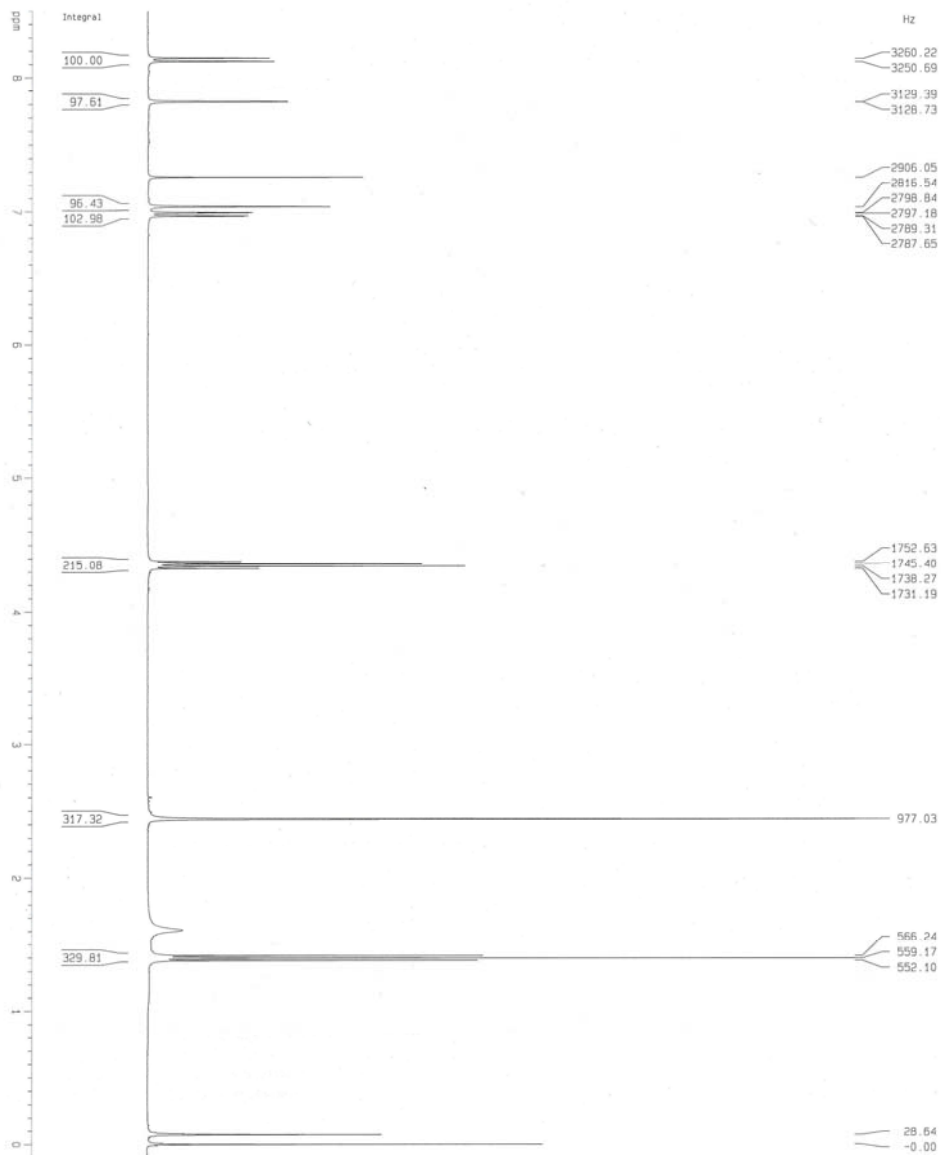

Current Data Parameters  
 NAME Jun-09  
 EXPNO 49  
 PROCNO 1

F2 - Acquisition Parameters  
 Date\_ 2009/03  
 Time 14.07  
 INSTRUM spect  
 CHANNEL 5 mm Dual 1H/13  
 PULPROG zgpg30  
 TD 32768  
 SFO 400.132710  
 SOLVENT CDCl3  
 NS 20  
 DS 0  
 SMH 8223.666 Hz  
 FTIDRES 0.250967 Hz  
 AQ 1.5923444 sec  
 RG 382  
 CW 60.800 usec  
 DE 6.00 usec  
 TE 295.2 K  
 D1 1.00000000 sec  
 ACQST 0.00000000 sec  
 ACQK 0.01500000 sec

\*\*\*\*\* CHANNEL f1 \*\*\*\*\*  
 NUC1 13C  
 P1 11.00 usec  
 PL1 -2.00 dB  
 SFO1 400.132710 MHz

F2 - Processing parameters  
 SI 15384  
 SF 400.1300085 MHz  
 MDW EM  
 SSB 0  
 LB 0.30 Hz  
 GB 0  
 PC 1.00

1D NMR Plot Parameters  
 CH 31.00 cm  
 CR 2.00 cm  
 F1P 8.6500 cm  
 F1 3401.10 Hz  
 F2P -0.100 ppm  
 F2 -43.01 Hz  
 SFO1 0.28667 ppm/cm  
 HZCM 114.70393 Hz/cm

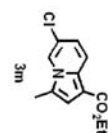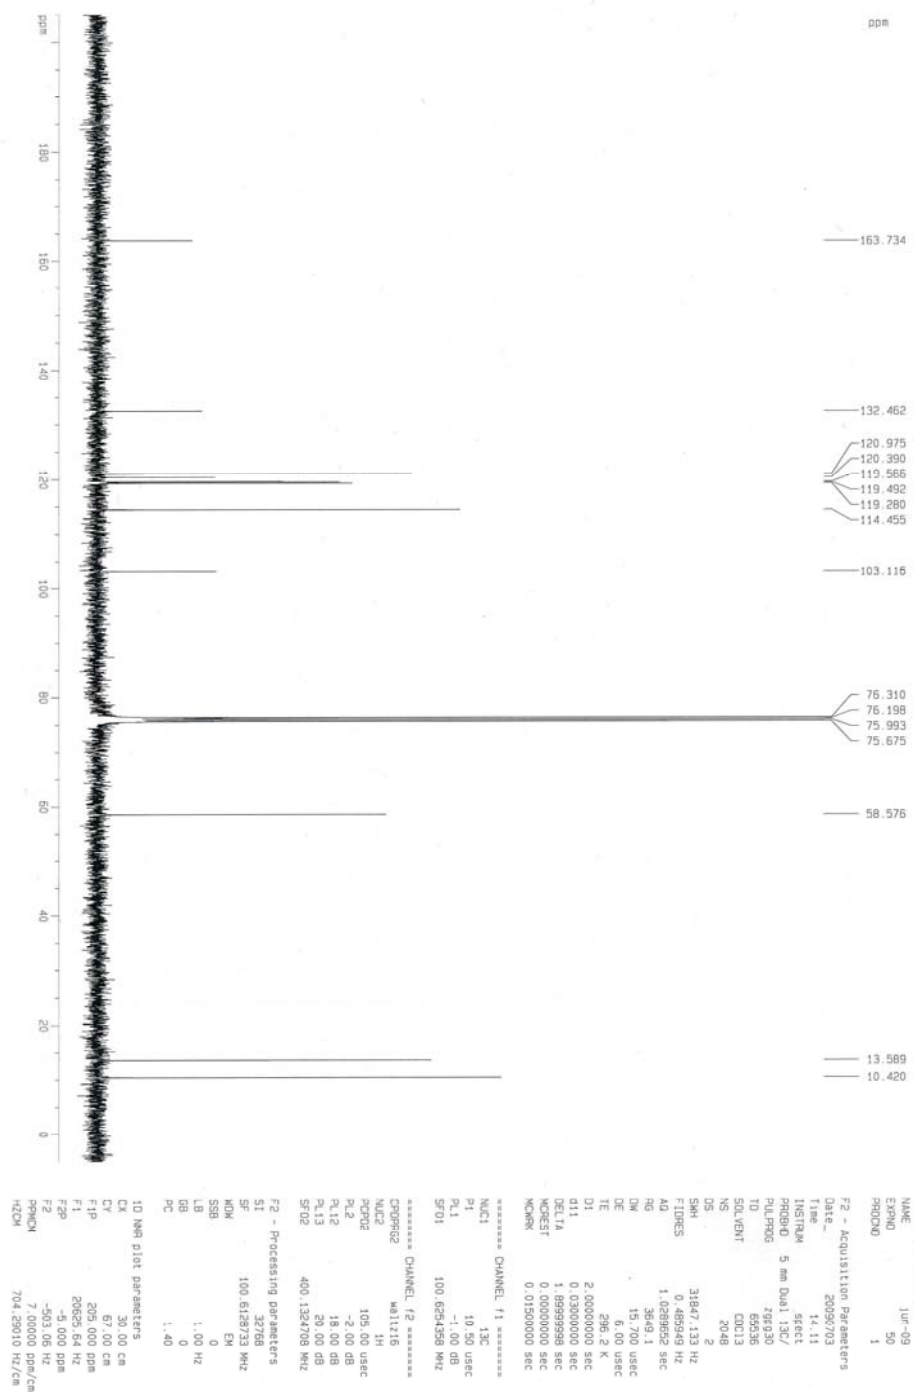

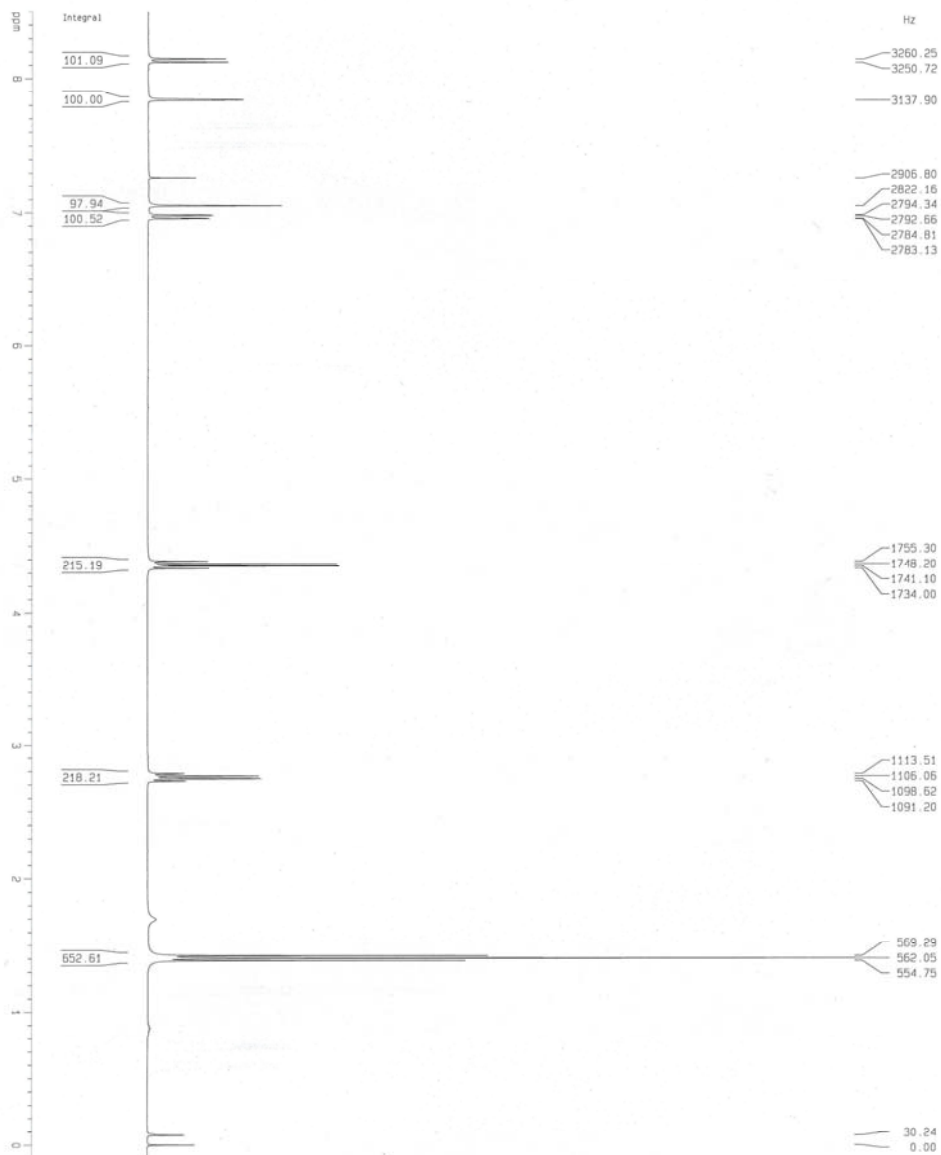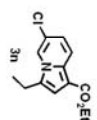

Current Data Parameters  
 NAME 1un-09  
 EXPNO 69  
 PROCNO 1

F2 - Acquisition Parameters  
 Date\_ 2009/09  
 Time 21.05  
 INSTRUM spect  
 PULPROG 5 mm QNP1 13C/  
 PRCPRG02  
 TD 32768  
 FID SOLVENT CDCl3  
 NS 32  
 DS 0  
 SMI 823.665 Hz  
 FIDRES 0.250967 Hz  
 AQ 1.9923444 sec  
 Hg 181  
 DM 60.800 usec  
 DE 6.00 usec  
 TE 295.2 K  
 D1 1.00000000 sec  
 ACQRES 0.00000000 sec  
 KCMPL 0.01500000 sec

\*\*\*\*\* CHANNEL f1 \*\*\*\*\*  
 NUC1 1H  
 P1 11.00 usec  
 PL1 -2.00 dB  
 SF01 400.1324710 MHz

F2 - Processing parameters  
 SI 15384  
 SF 400.1300076 MHz  
 WDM EM  
 SSB 0  
 LB 0.30 Hz  
 GB 0  
 PC 1.00

1D NMR Plot Parameters  
 CX 30.00 cm  
 C1 20.00 cm  
 F1P 61.500 MHz  
 F1 340.000 MHz  
 F2P -40.01 Hz  
 F2 -0.100 MHz  
 PPMCK 0.28667 ppm/cm  
 HZCM 114.70393 Hz/cm

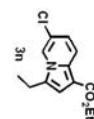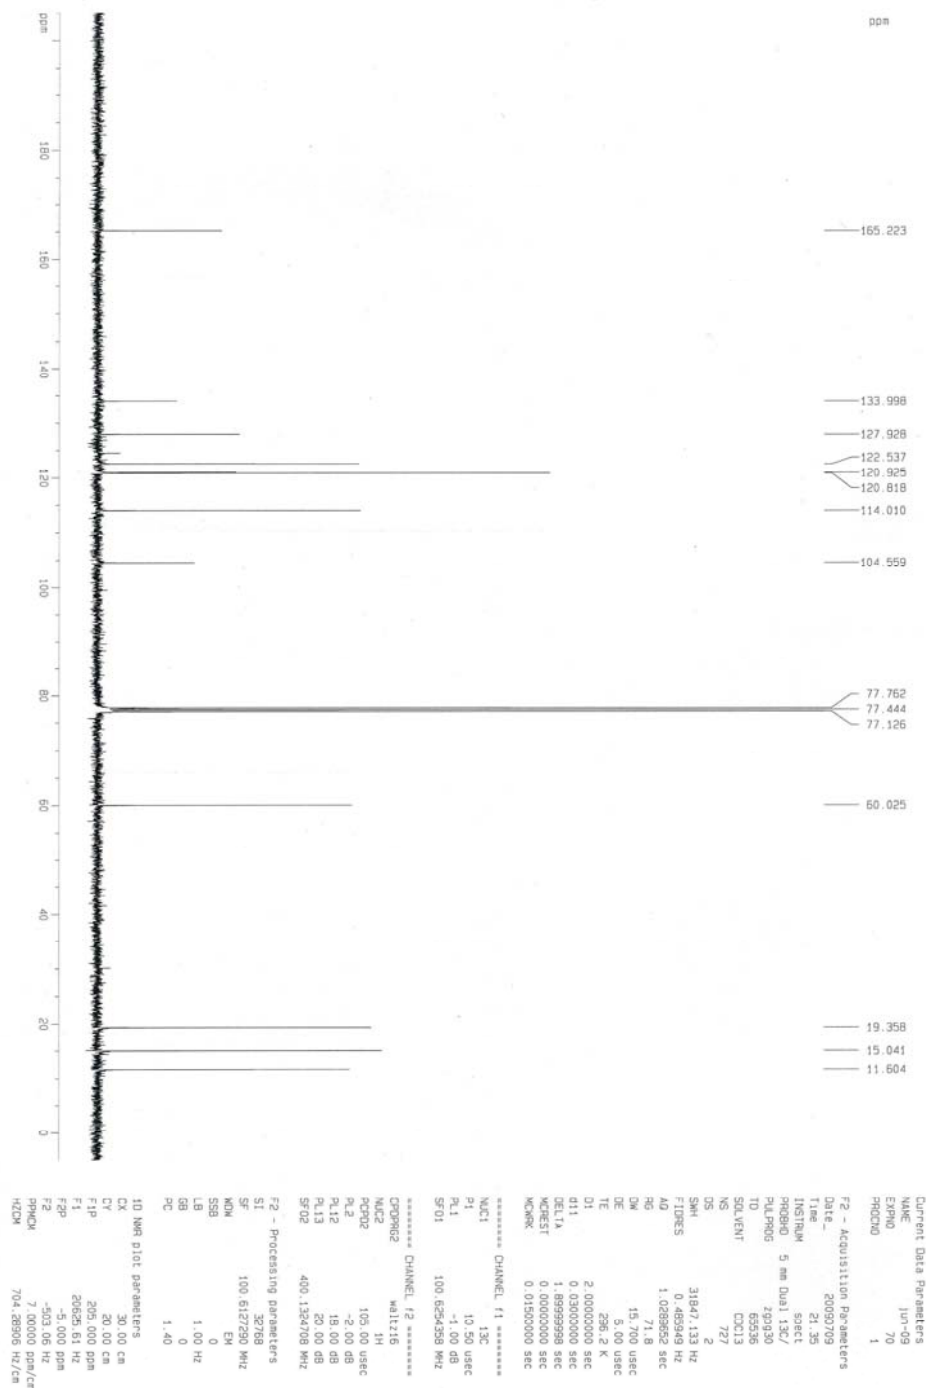

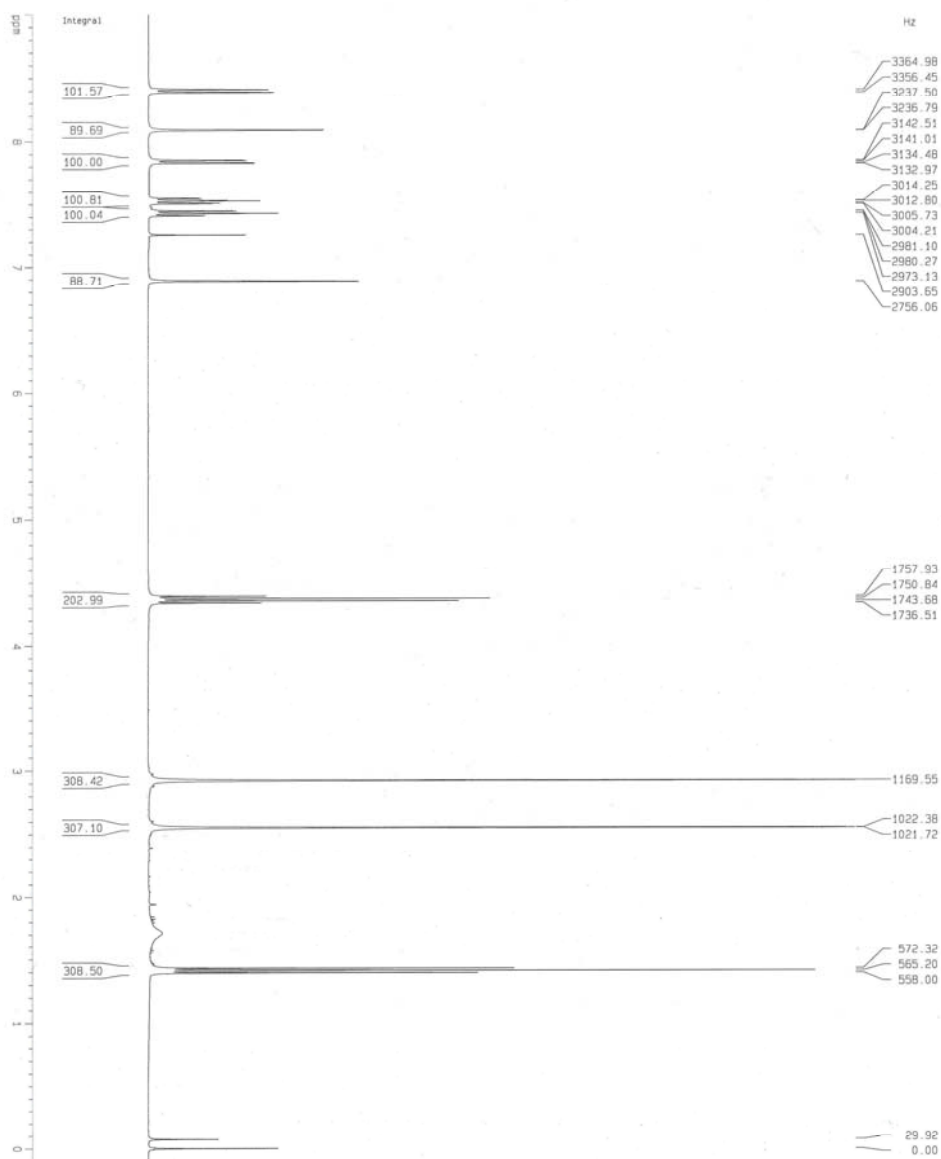

Current Data Parameters  
 NAME 1u1-09  
 EXPNO 77  
 PROCNO 1

F2 - Acquisition Parameters  
 Date\_ 20080623  
 Time 18:23  
 INSTRUM spect  
 PROBP0 5 mm Dual 13C/  
 PULPROG zgpg30  
 TD 32768  
 SOLVENT DMS-D1  
 NS 32  
 DS 0  
 SMI 8223.689 Hz  
 FIDRES 0.2509687 Hz  
 AQ 1.9923444 sec  
 RG 256  
 DW 60.800 usec  
 DE 6.00 usec  
 TE 300.2 K  
 D1 1.00000000 sec  
 MCKEY 0.00000000 sec  
 MCKM 0.01500000 sec

\*\*\*\*\* CHANNEL f1 \*\*\*\*\*  
 NUC1 13C  
 P1 11.00 usec  
 PL1 -2.00 dB  
 SF01 400.1324710 MHz

F2 - Processing parameters  
 SI 16384  
 SF 400.1300108 MHz  
 WDM EM  
 SSB 0  
 LB 0.30 Hz  
 GB 0  
 PC 1.00

1D NMR plot parameters  
 CX 32.80 cm  
 CY 2.00 cm  
 CZ 9.000 cm  
 F1 9601.17 Hz  
 F2 -40.100 ppm  
 F2P -40.01 Hz  
 PPM0 0.30333 ppm/cm  
 HZCM 121.37276 Hz/cm



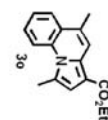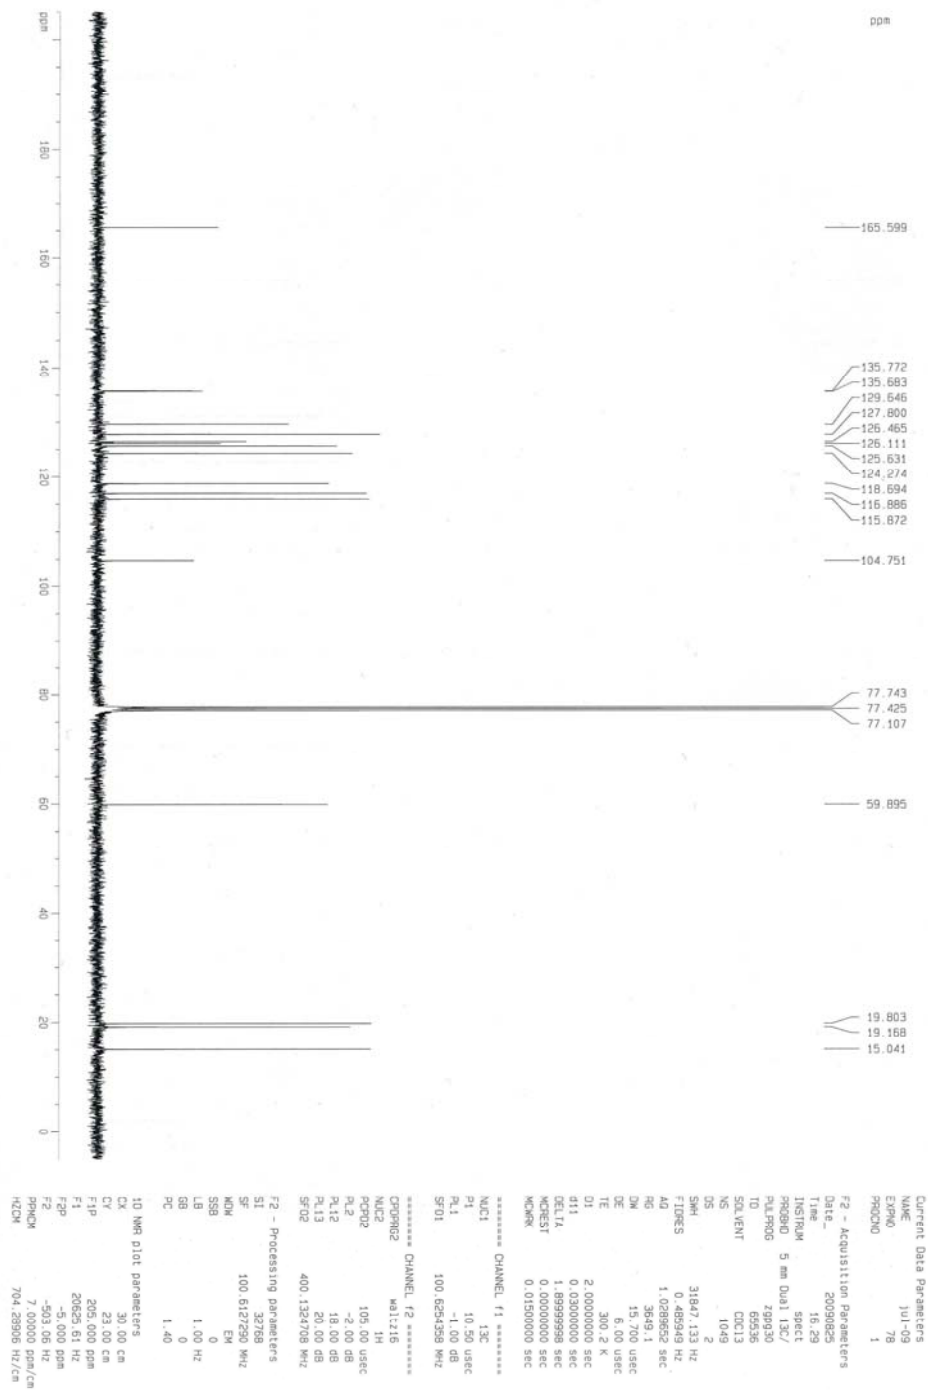

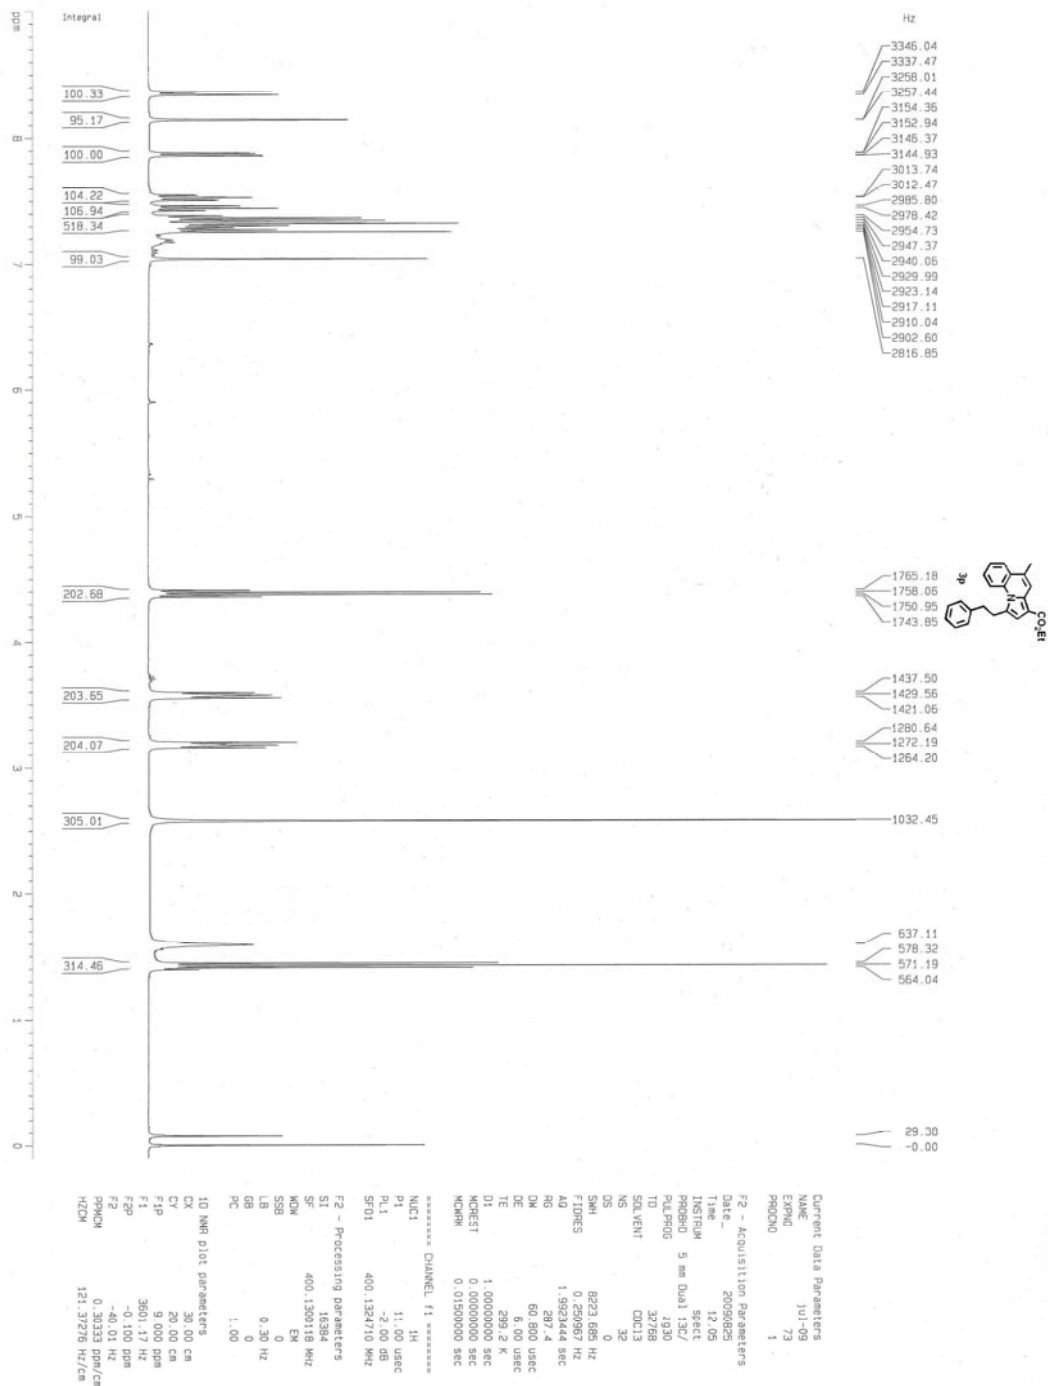

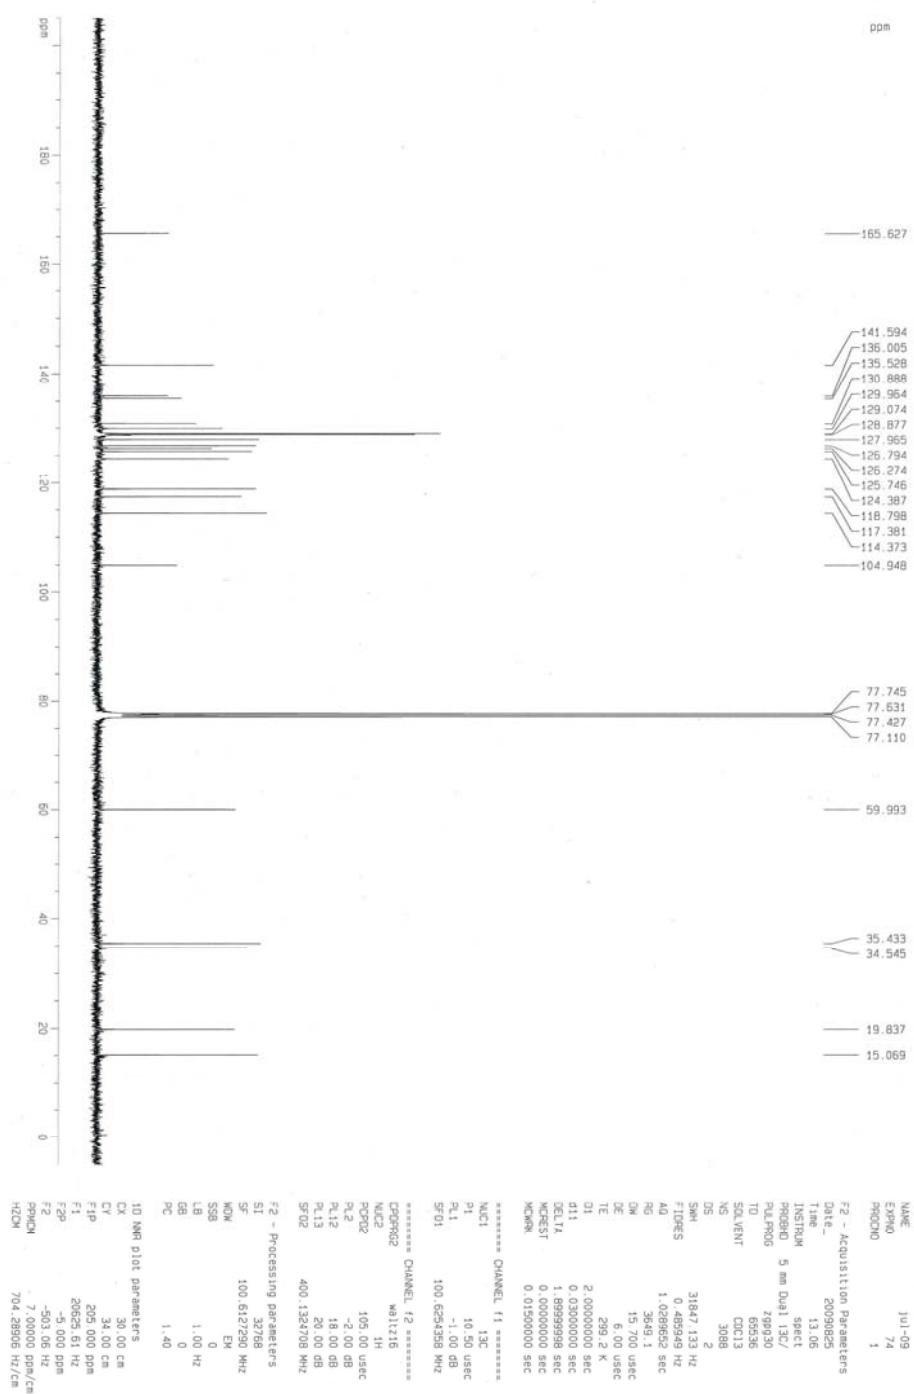

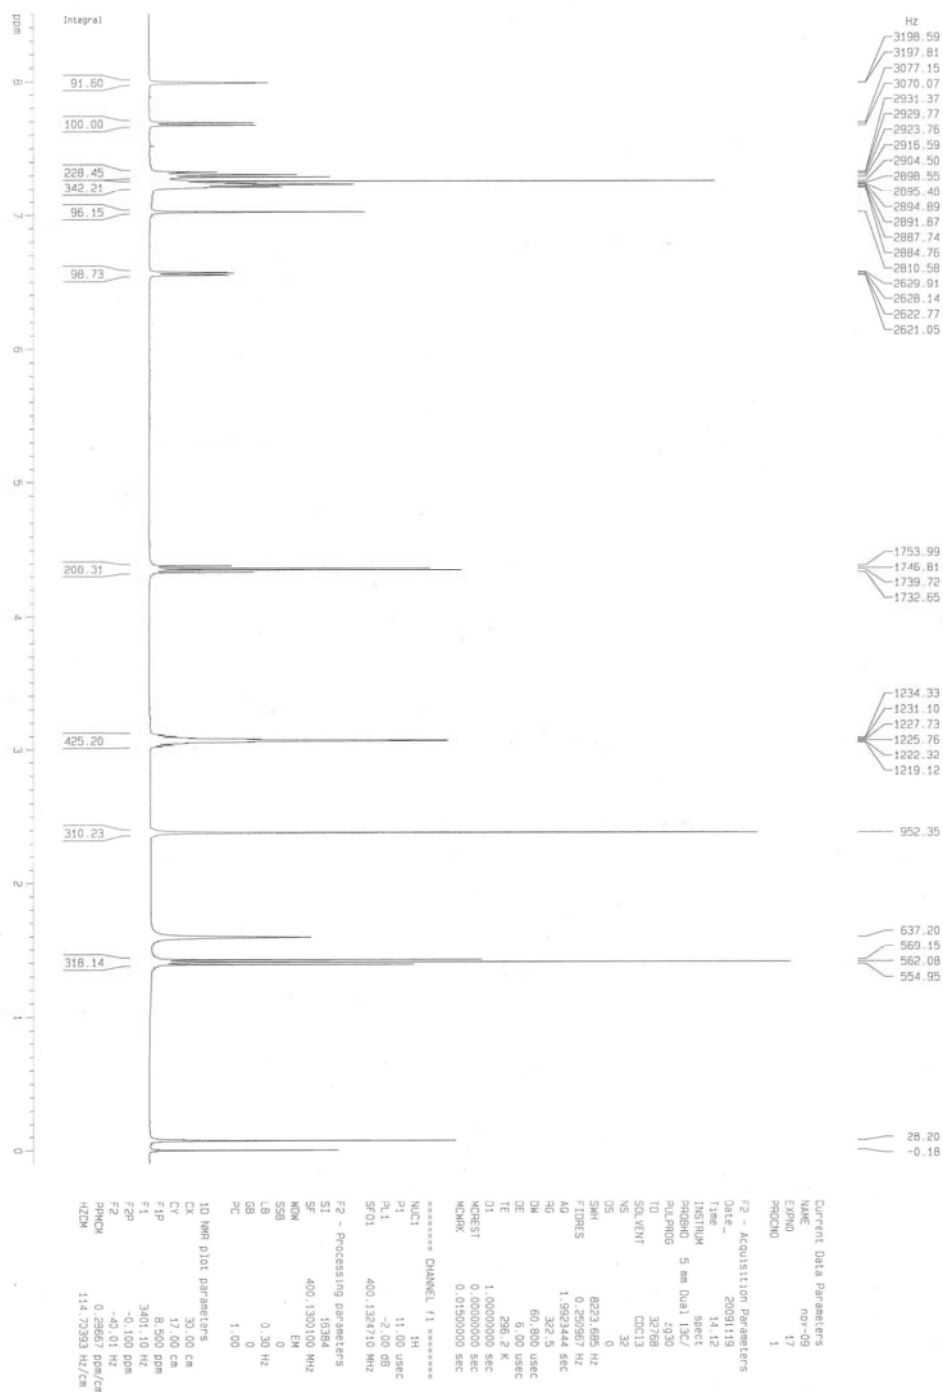

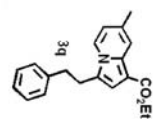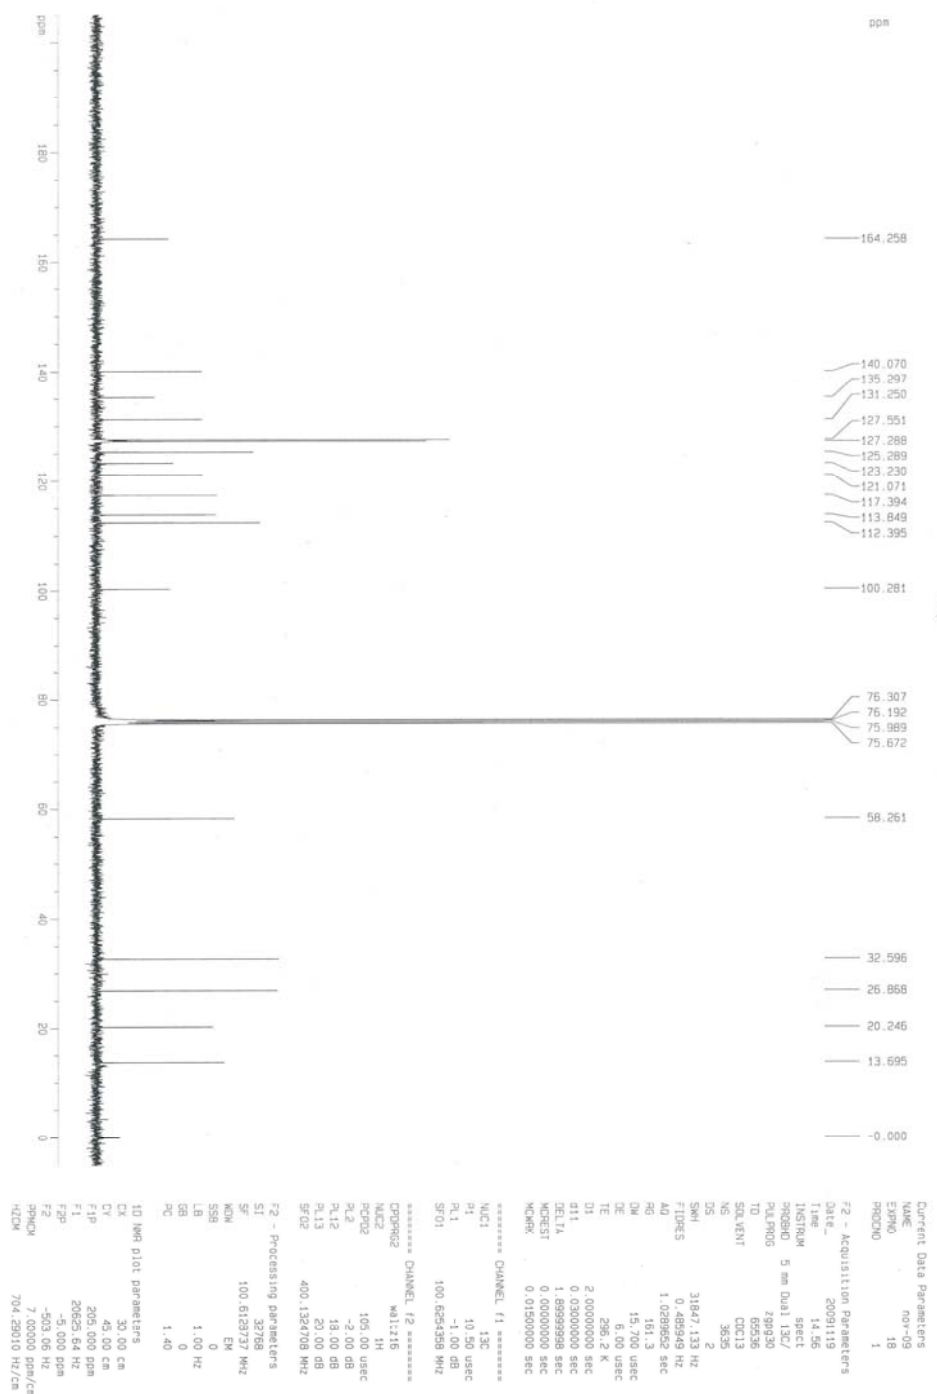

Supplement: c0cc01945c.pdf [file c0cc01945c.pdf]
